# Conserved chromatin and repetitive patterns reveal slow genome evolution in frogs

Jessen V. Bredeson<sup>1†</sup>, Austin B. Mudd<sup>1†</sup>, Sofia Medina-Ruiz<sup>1†</sup>, Therese Mitros<sup>1</sup>, Owen K. Smith<sup>2</sup>, Kelly E. Miller<sup>1</sup>, Jessica B. Lyons<sup>1,3</sup>, Sanjit S. Batra<sup>4</sup>, Joseph Park<sup>1</sup>, Kodiak C. Berkoff<sup>1</sup>, Christopher Plott<sup>5</sup>, Jane Grimwood<sup>5</sup>, Jeremy Schmutz<sup>5</sup>, Guadalupe Aguirre-Figueroa<sup>2</sup>, Mustafa K. Khokha<sup>6</sup>, Maura Lane<sup>6</sup>, Isabelle Philipp<sup>1</sup>, Mara Laslo<sup>7</sup>, James Hanken<sup>7</sup>, Gweneg Kerdivel<sup>8</sup>, Nicolas Buisine<sup>8</sup>, Laurent M. Sachs<sup>8</sup>, Daniel R. Buchholz<sup>9</sup>, Taejoon Kwon<sup>10</sup>, Heidi Smith-Parker<sup>11</sup>, Marcos Gridi-Papp<sup>12</sup>, Michael J. Ryan<sup>11</sup>, Robert. D. Denton<sup>13</sup>, John H. Malone<sup>13</sup>, John B. Wallingford<sup>14</sup>, Aaron F. Straight<sup>2</sup>, Rebecca Heald<sup>1</sup>, Dirk Hockemeyer<sup>1,3,16</sup>, Richard M. Harland<sup>1</sup>, Daniel S. Rokhsar<sup>1,3,15,16,\*</sup>

<sup>1</sup>Department of Molecular and Cell Biology, Weill Hall, University of California, Berkeley, CA, 94720, USA.

<sup>2</sup>Department of Biochemistry, Stanford University School of Medicine, 279 Campus Drive, Beckman Center 409, Stanford, CA, 94305-5307, USA.

<sup>3</sup>Innovative Genomics Institute, University of California, Berkeley, CA, 94720, USA.

<sup>4</sup>Computer Science Division, University of California Berkeley, 2626 Hearst Avenue, Berkeley, CA, 94720, USA.

<sup>5</sup>Genome Sequencing Center, HudsonAlpha Institute for Biotechnology, Huntsville, AL, USA.

<sup>6</sup>Pediatric Genomics Discovery Program, Departments of Pediatrics and Genetics, Yale University School of Medicine, 333 Cedar Street, New Haven, CT, 06510, USA.

<sup>7</sup>Department of Organismic and Evolutionary Biology, and Museum of Comparative Zoology, Harvard University, Cambridge, MA, 02138, USA.

<sup>8</sup>Département Adaptation du Vivant, UMR 7221 CNRS, Muséum National d'histoire Naturelle, Paris, France.

<sup>9</sup>Department of Biological Sciences, University of Cincinnati, Cincinnati, OH, USA.

<sup>10</sup>Department of Biomedical Engineering, Ulsan National Institute of Science and Technology, Ulsan, 44919, Republic of Korea.

<sup>11</sup>Department of Integrative Biology, Patterson Labs, 2401 Speedway, University of Texas, Austin, TX, 78712, USA.

<sup>12</sup>Department of Biological Sciences, University of the Pacific, 3601 Pacific Avenue, Stockton, CA, 95211, USA.

<sup>13</sup>Department of Molecular and Cell Biology and Institute of Systems Genomics, University of Connecticut, 181 Auditorium Road, Unit 3197, Storrs, CT, 06269, USA.

<sup>14</sup>Department of Molecular Biosciences, Patterson Labs, 2401 Speedway, The University of Texas at Austin, Austin, TX, 78712, USA.

<sup>15</sup>Okinawa Institute of Science and Technology Graduate University, Onna, Okinawa, 9040495, Japan.

<sup>16</sup>Chan-Zuckerberg BioHub, 499 Illinois Street, San Francisco, CA, 94158, USA.

<sup>†</sup>These authors contributed equally

<sup>\*</sup>Corresponding authors

# 1 **Abstract**

2 **Frogs are an ecologically diverse and phylogenetically ancient group of living**  
3 **amphibians that include important vertebrate cell and developmental model systems,**  
4 **notably the genus *Xenopus*. Here we report a high-quality reference genome sequence**  
5 **for the western clawed frog, *Xenopus tropicalis*, along with draft chromosome-scale**  
6 **sequences of three distantly related emerging model frog species, *Eleutherodactylus***  
7 ***coqui*, *Engystomops pustulosus* and *Hymenochirus boettgeri*. Frog chromosomes have**  
8 **remained remarkably stable since the Mesozoic Era, with limited Robertsonian (i.e.,**  
9 **centric) translocations and end-to-end fusions found among the smaller chromosomes.**  
10 **Conservation of synteny includes conservation of centromere locations, marked by**  
11 **centromeric tandem repeats associated with Cenp-a binding, surrounded by**  
12 **pericentromeric LINE/L1 elements. We explored chromosome structure across frogs,**  
13 **using a dense meiotic linkage map for *X. tropicalis* and chromatin conformation capture**  
14 **(HiC) data for all species. Abundant satellite repeats occupy the unusually long (~20**  
15 **megabase) terminal regions of each chromosome that coincide with high rates of**  
16 **recombination. Both embryonic and differentiated cells show reproducible association of**  
17 **centromeric chromatin, and of telomeres, reflecting a Rab1 configuration similar to the**  
18 **“bouquet” structure of meiotic cells. Our comparative analyses reveal 13 conserved**  
19 **ancestral anuran chromosomes from which contemporary frog genomes were**  
20 **constructed.**

## 21 Main Text

### 22 Introduction

23 Amphibians are widely used models in developmental and cell biology<sup>1–5</sup>, and their importance  
24 extends to the fields of infectious disease, ecology, pharmacology, environmental health, and  
25 biological diversity<sup>6–10</sup>. While the principal model systems belong to the genus *Xenopus* (notably  
26 the diploid western clawed frog *X. tropicalis* and the paleo-allotetraploid African clawed frog *X.*  
27 *laevis*, other amphibian models have increasingly been introduced due to their diverse  
28 developmental, cell biological, physiological, and behavioral adaptations<sup>11–14</sup>.

29

30 While genome evolution has been extensively studied in mammals<sup>15</sup> and birds<sup>16,17</sup>, the relative  
31 lack of phylogenetically diverse chromosome-scale frog genomes has limited the study of  
32 genome evolution in anuran amphibians. Here, we report a high-quality assembly for *X.*  
33 *tropicalis* and three new chromosome-scale genome assemblies for the direct-developing  
34 Puerto Rican coquí (*Eleutherodactylus coqui*), the túngara frog (*Engystomops pustulosus*),  
35 which is a model for vocalization, and the Zaire dwarf clawed frog (*Hymenochirus boettgeri*),  
36 which has an unusually small embryo and is a model for regulation of cell and body sizes.  
37 Genome assemblies are essential resources for further work to exploit the experimental  
38 possibilities of these diverse animals. The new high quality *X. tropicalis* genome upgrades  
39 previous draft assemblies<sup>18,19</sup> and our new genomes complement draft chromosome-scale  
40 sequences for the African clawed frog<sup>20</sup> (*Xenopus laevis*), the African bullfrog<sup>21</sup> (*Pyxicephalus*  
41 *adspersus*), the Leishan moustache toad<sup>22</sup> (*Leptobrachium leishanense*), the Ailao moustache  
42 toad<sup>23</sup> (*Leptobrachium [Vibrissaphora] ailaonicum*), and Asiatic toad<sup>24</sup> (*Bufo gargarizans*), as  
43 well as scaffold- and contig-scale assemblies for other species<sup>25</sup>. The rapidly increasing number

44 of chromosome-scale genome assemblies makes anurans ripe for comparative genomic and  
45 evolutionary analysis.  
46  
47 Chromosome number variation among frogs is limited<sup>26</sup>. Based on cytological<sup>27,28</sup> and sequence  
48 comparisons<sup>18,20,26,29,30</sup> most frogs have  $n \sim 10\text{--}12$  pairs of chromosomes. The constancy of the  
49 frog karyotype is in contrast with the more dramatic variation seen across mammals<sup>15,31</sup>, which  
50 as a group is considerably younger than frogs. The constancy of the frog karyotype parallels the  
51 static karyotypes of birds<sup>16</sup>, although birds typically have nearly three times more chromosomes  
52 than frogs, including numerous microchromosomes (among frogs, only the basal *Ascaphus*<sup>32</sup>  
53 has microchromosomes). Despite the stable frog chromosome number, however, fusions,  
54 fissions, and other inter-chromosomal rearrangements do occur, and we can use comparisons  
55 among chromosome-scale genome sequences to (1) infer the ancestral chromosomal elements,  
56 (2) determine the rearrangements that have occurred along frog phylogeny, and (3) characterize  
57 the patterns of chromosomal change among frogs. These findings of conserved synteny among  
58 frogs are consistent with prior demonstrations of conservation between *Xenopus tropicalis* with  
59 other tetrapods, including human and chicken<sup>18,33</sup>.  
60  
61 Since frog karyotypes are so highly conserved, *X. tropicalis* can be used as a model for studying  
62 chromosome structure, chromatin interaction, and recombination for the entire clade. Features  
63 that can be illuminated at the sequence level include the structure and organization of  
64 centromeres and nature of the unusually long subtelomeres relative to mammals (frog  
65 subtelomeres are ~20 megabases, compared with the mammalian subtelomeres that are  
66 typically shorter than a megabase). The extended subtelomeres of frogs form interacting  
67 chromatin structures in interphase nuclei that reflect three-dimensional intra-chromosome and  
68 inter-chromosome subtelomeric contacts, which are consistent with a Rab1 configuration. As in  
69 other animals, subtelomeres of frogs have an elevated GC content and recombination rate.



70 Here we show that the unusually high enrichment of recombination in the subtelomeres likely  
71 reflects similar structural and functional properties in other vertebrates, though the quality of the  
72 assembly reveals that the length of subtelomeres, enrichment of transposon subsequences by  
73 unequal crossing over, and high recombination rates are considerably greater than in mammals.  
74 We use Cenp-a binding at satellites to confirm centromere identity and extend the predictive  
75 power of the repeat structures to centromeres of other frogs. We address the unusually high  
76 recombination rate in subtelomeric regions, correlating with the landscape of base composition  
77 and transposons. Over the 200 million years of evolution that we address here, centromeres  
78 have generally been stable, but the few karyotypic changes reveal the predominant  
79 Robertsonian translocations at centromeric regions; we also document the slow degeneration  
80 that occurs to inactivated centromeres and fused telomeres, changes that are obscured in  
81 animals with rapidly evolving karyotypes.

82

## 83 Results

### 84 New frog genome sequences

#### 85 High-quality chromosome-scale genome assembly for *X. tropicalis*

86 To establish a high-quality chromosomal reference genome sequence to study the structure and  
87 organization of *Xenopus tropicalis* chromosomes and for comparisons with other frog genomes,  
88 we integrated multiple sequencing technologies, including Single-Molecule Real-Time long  
89 reads (SMRT sequencing; Pacific Biosciences), linked read sets (10x Genomics), short-read  
90 shotgun sequencing, *in vivo* chromatin conformation capture, and meiotic mapping, combined  
91 with previously generated dideoxy shotgun sequence (**Supplementary Data 1, Supplementary**  
92 **Figs. 1A–D and 2, and Supplementary Notes 1 and 2**). New sequences were generated from  
93 17th generation individuals from the same inbred Nigerian line that was used in the original

94 Sanger shotgun sequencing<sup>33</sup>. The completeness, protein coding capacity, repeat structure and  
95 sequence variation are discussed in supplementary information (**Supplementary Figs. 1–6** and  
96 **Supplementary Tables 1–4**) providing the basis for comparisons.

97

98 The new v10 reference assembly spans 1,448.4 Mb and is substantially more complete than the  
99 previous v9 sequence<sup>18</sup>, assigning 219.2 Mb more sequence to chromosomes (**Supplementary**  
100 **Table 1**). The v10 assembly is also far more contiguous, with half of the sequence contained in  
101 32 contigs longer than 14.6 Mb (vs. 71.0 kb in v9). The assembly captures 99.6% of known  
102 coding sequence (**Supplementary Table 2, Supplementary Note 2**). We found that the  
103 fragmented quality of earlier assemblies was due in part to the fact that 68.3 Mb (4.71%) of the  
104 genome was not sampled by the 8× redundant Sanger dideoxy whole-genome shotgun  
105 dataset<sup>33</sup> (**Supplementary Fig. 3, Supplementary Note 2**). These missing sequences,  
106 apparently due to non-uniformities in shotgun cloning and/or sequences (**Supplementary Fig.**  
107 **1E**), are distributed across an estimated 140.5k blocks of mean size 485.7 bp (longest 50.0 kb)  
108 on the new reference assembly and capture an additional 6,774 protein-coding exons  
109 (**Supplementary Fig. 1F–G**). The enhanced contiguity of v10 is accounted for by the relatively  
110 uniform coverage of PacBio long-read sequences on the genome, as expected from other  
111 studies<sup>34–37</sup>. Most remaining gaps are in highly repetitive and satellite-rich centromeres and  
112 subtelomeric regions (see below) (**Supplementary Figs. 1H and 3**).

113

#### 114 **Additional chromosome-scale frog genomes**

115 To assess the evolution of chromosome structure across a diverse set of frogs, we generated  
116 chromosome-scale genome assemblies for three new emerging model species, including the  
117 Zaire dwarf clawed frog *Hymenochirus boettgeri* (a member of the family Pipidae along with  
118 *Xenopus* spp.) and two neobatrachians: the Puerto Rican coquí *Eleutherodactylus coqui* (family

119 Eleutherodactylidae) and the túngara frog *Engystomops pustulosus* (family Leptodactylidae).  
120 These chromosome-scale draft genomes were primarily assembled from short-read datasets  
121 and chromatin conformation capture (HiC) data (**Supplementary Data 1, Supplementary**  
122 **Table 5, Supplementary Note 3**). To further expand the scope of our comparisons, we also  
123 updated the assemblies of two recently published frog genomes: the African bullfrog  
124 *Pyxicephalus adspersus*<sup>21</sup> from the neobatrachian family Pyxicephalidae, and the Ailao  
125 moustache toad *Leptobrachium (Vibrissaphora) ailaonicum*<sup>22</sup> from the family Megophryidae  
126 (**Supplementary Fig. 7, Supplementary Note 3**). These species span the pipanuran clade,  
127 which comprises all extant frogs except for a small number of phylogenetically basal taxa, such  
128 as *Ascaphus*<sup>38</sup>.

129  
130 The chromosome numbers of the new assemblies agree with previously described karyotypes  
131 for *E. coqui*<sup>39</sup> ( $2n = 26$ ) and *E. pustulosus*<sup>40</sup> ( $2n = 22$ ). The literature for *H. boettgeri*, however, is  
132 more equivocal, with reports<sup>41,42</sup> of  $2n = 20-24$ . The  $n = 9$  chromosomes in our *H. boettgeri*  
133 assembly are consistent with our chromosome spreads (**Supplementary Fig. 7A**). The  
134 karyotype variability in the published literature and discrepancy with karyotypes of our *H.*  
135 *boettgeri* samples may be the result of cryptic sub-populations within this species, or  
136 segregating chromosome polymorphisms.

137

### 138 **Protein-coding gene set for *X. tropicalis***

139 The improved *X. tropicalis* genome encodes an estimated 25,016 protein-coding genes  
140 (**Supplementary Table 3**), which we predicted by taking advantage of 8,580 full-length-insert *X.*  
141 *tropicalis* cDNAs from the “Mammalian” Gene Collection<sup>43</sup> (MGC), 1.27 million Sanger-  
142 sequenced expressed sequence tags<sup>33</sup> (ESTs), and 334.5 Gbp of RNA-seq data from an  
143 aggregate of 16 conditions and tissues<sup>44,45</sup> (**Supplementary Data 1, Supplementary Note 2**).

144 The predicted gene set is a notable improvement on previous annotations, both in  
145 completeness and in full-length gene-level accuracy, due in part to the more complete assembly  
146 (**Supplementary Fig. 1, Supplementary Table 2, Supplementary Note 2**). In particular, gaps  
147 in the earlier genome assemblies arising from cloning biases in the Sanger sequencing process  
148 and encompassing exons embedded in highly repetitive sequences have been filled by single  
149 molecule long reads (**Supplementary Figures 1 and 3**).

150

151 A measure of this completeness and the utility of the *X. tropicalis* genome is provided by  
152 comparing its gene set with those of vertebrate model systems with reference-quality genomes,  
153 including chicken<sup>46</sup>, zebrafish<sup>47</sup>, mouse<sup>48</sup> and human<sup>49,50</sup> (**Supplementary Fig. 4**). Notably,  
154 despite the closer phylogenetic relationship between birds and mammals, *X. tropicalis* shares  
155 more orthologous gene families (and mutual best hits) with human than does chicken, possibly  
156 because of the loss of genomic segments in the bird lineage<sup>16,51</sup> and/or residual incompleteness  
157 of the chicken reference sequence, due to the absence of several microchromosomes<sup>46</sup>. For  
158 example, of 13,009 vertebrate gene families with representation from at least four of the  
159 vertebrate reference species, only 341 are missing from *X. tropicalis* versus 1,110 from chicken  
160 (**Supplementary Fig. 4**). The current *X. tropicalis* genome assembly also resolves gene order  
161 and completeness of gene structures in the long subtelomeres that were missed in previous  
162 assemblies due to their highly repetitive nature (**Supplementary Fig. 1F–G**).

163

#### 164 **Protein-coding gene sets for other frogs**

165 We annotated the new genomes of *E. coqui*, *E. pustulosus*, *H. boettgeri*, and *P. adspersus*  
166 using transcriptome data from these species (**Supplementary Data 1**) and peptide homology  
167 with *X. tropicalis* (**Supplementary Tables 6 and 7**). To include mustache toad in our cross-frog  
168 comparisons we adopted the published annotation of Li et al.<sup>22</sup> (**Supplementary Note 3**). We

169 found 14,412 orthologous groups across the five genera with OrthoVenn2<sup>52</sup>, including genes  
170 found in at least four of the five frog genera represented (**Supplementary Fig. 7B**). As  
171 expected, due to its reference-quality genome and well-studied transcriptome, only 72 of these  
172 clusters were not represented in *X. tropicalis*; the other frog genomes each had between 575  
173 and 712 of these genes missing (or mis-clustered), suggesting better than 95% completeness in  
174 the other species. For analyses of synteny, we further restricted our attention to 7,292 one-to-  
175 one gene orthologs that were present on chromosomes (as opposed to unlinked scaffolds) in  
176 the “core” genomes *X. tropicalis*, *H. boettgeri*, *E. coqui*, *E. pustulosus*, and *P. adspersus*. The  
177 total branch length in the pipanuran tree shown in **Fig. 1** (including both *X. laevis* subgenomes)  
178 is 2.58 substitutions per four-fold synonymous site.

179

## 180 Repetitive landscape

181 Centromeric and telomeric tandem repeats play a critical role in the stability of chromosome  
182 structure<sup>53</sup>. Nonetheless, other kinds of repeats also play a role in the preservation of these  
183 important chromosome landmarks<sup>54,55</sup>. The new *X. tropicalis* v10 assembly captures sequences  
184 from centromeres and distal sub-telomeres that were fragmented in the previous  
185 assemblies<sup>18,33</sup>. The percentage of the genome covered by transposable elements is slightly  
186 higher than previously reported<sup>33</sup> (36.82% vs. 34%) (**Supplementary Table 4**).

187

188 Insertional bias in the pericentromeric regions is observed for specific families of long  
189 interspersed elements (LINEs), including the relatively young Chicken Repeat 1 (CR1, ref.<sup>56</sup>)  
190 (3.14% of the genome) and the ancient L1 (1.06%) (**Fig. 2** and **Supplementary Fig. 5**). The *X.*  
191 *tropicalis* v10 assembly captures significantly more tandem repeats in the distal subtelomeric  
192 portions of the genome relative to earlier assemblies. An exhaustive search for tandem repeats  
193 using Tandem Repeat Finder<sup>57</sup> determined that 10.67% of the chromosomes is covered by

194 tandem arrays consisting of 5 or more monomeric units greater than 10 bp. Many tandem  
195 repeat footprints are in gaps from previous assemblies<sup>18,33</sup> (**Supplementary Fig. 3**). Our new  
196 hybrid genome assembly closed many gaps containing centromeric and subtelomeric tandem  
197 repeats and captured numerous subtelomeric genes (**Supplementary Fig. 1**). The overall  
198 repeat landscape derived from the *X. tropicalis* assembly is mirrored in the other frog  
199 assemblies, with similar centromeric repeats, and lengthy subtelomeres, as discussed below  
200 (**Supplementary Fig. 9**).

201

## 202 Genetic variation

203 Although the *X. tropicalis* reference genotype is highly inbred, it nevertheless retains 15 long  
204 heterozygous blocks ranging in size from 1.34 to 74.6 Mb. This exceeds the expectations based  
205 on 17 generations of brother-sister mating, suggesting residual heterozygosity could be  
206 maintained by balancing selection. Within the heterozygous blocks we observe 3.0 single  
207 nucleotide variants per kilobase. To begin to develop a catalog of segregating variation we  
208 sequenced pools of frogs from the Nigerian and Ivory Coast B populations, which have been  
209 previously analysed using SSLP markers<sup>58</sup>. From our light pool shotgun analysis we identified a  
210 total of 6,546,379 SNPs. There were 2,482,703 variants in the Nigerian pool and 4,661,928 in  
211 the Ivory Coast B pool, with 598,252 shared by both pools, pointing to substantial differentiation  
212 between populations (**Supplementary Fig. 6, Supplementary Note 2**).

213

## 214 Evolutionary dynamics of frog chromosomes

### 215 Conserved synteny and ancestral chromosomes

216 Comparison of the chromosomal positions of orthologs across seven frog genomes reveals  
217 extensive conservation of synteny and collinearity (**Fig. 1, Supplementary Fig. 8**). We identified

218 13 conserved pipanuran syntenic units that we denote A through M (**Methods, Supplementary**  
219 **Note 4**). Each unit likely represents an ancestral pipanuran chromosome, an observation  
220 consistent with the  $2n = 26$  ancestral karyotype inferred from cytogenetic comparisons across  
221 frogs<sup>27,59</sup>. Over 95% (6,952 of 7,292) of chromosomal one-to-one gene orthologs are maintained  
222 in the same unit across the five frog species, attesting to the stability of these chromosomal  
223 elements (**Fig. 1**). The conservation of gene content per element is comparable to the 95%  
224 ortholog maintenance in the Muller elements in *Drosophila* spp.<sup>60</sup>. Despite an over two-fold  
225 difference in total genome size across the sampled genomes, each ancestral pipanuran element  
226 accounts for a nearly constant proportion of the total genome size, gene count, and repeat  
227 count in each species, implying uniform expansions and contractions during the history of the  
228 clade (**Supplementary Fig. 7C**).

229

230 At least some of these pipanuran elements have a deeper ancestry within amphibians.  
231 Comparison with the genome of the axolotl, *Ambystoma mexicanum*—a member of the order  
232 Caudata (salamanders and newts), and ~292 million years divergent from pipanurans<sup>61</sup>—  
233 reveals conservation of multiple syntenic units (**Supplementary Fig. 8A**). For example, axolotl  
234 chromosomes 4, 6, 7, and 14 are in near 1:1 correspondence with pipanuran elements F, A, B  
235 and K, respectively, although small pieces of F and A can be found on axolotl 10, and parts of B  
236 can be found on axolotl 9 and 13. Other axolotl chromosomes are fusions of parts of two or  
237 more pipanuran elements. For example, axolotl chromosome 5 is a fusion of a portion of J with  
238 most of G; the remainder of G is fused with a portion of L on the q arm of axolotl 2. Further  
239 comparisons are needed to determine which of these rearrangements occurred on the axolotl  
240 vs. the stem pipanuran lineage. Genomes from the superfamilies Leiopelmatoidea and  
241 Alytoidea, which diverged prior to the radiation of pipanurans, will also be informative.

242

## 243 **Chromosome evolution**

244 Block rearrangements of the 13 ancestral elements dominate the evolutionary dynamics of  
245 pipanuran karyotypes (**Table 1, Fig. 1**). While element C has remained intact as a single  
246 chromosome across the group (except for internal inversions), all the other elements have  
247 experienced translocations during pipanuran evolution. During these translocations, the  
248 elements have remained intact with the exception of the breakage of elements A and M by  
249 reciprocal partial arm exchange observed in *P. adspersus* chromosomes 3 and 6.

250

251 To trace the evolutionary history of centromeres shown in **Fig. 1**, we inferred their positions  
252 using HiC contact map patterns as in *X. tropicalis* (where centromeres were also confirmed by  
253 analysis of Cenp-a binding as described below). In general, the pericentromeres of other  
254 pipanurans were characterized by the same repetitive element families found in *Xenopus*,  
255 further corroborating their identification. Overall, we found broad pericentromeric conservation  
256 among the species analyzed (**Figs. 1 and 3A**).

257

258 Robertsonian or centric translocations involving breaks and joins near centromeres account for  
259 several of the rare rearrangements (**Figs. 1 and 3B**). For example, element G clearly  
260 experienced a centric fission in the *E. coqui* lineage. Conversely, I and M underwent centric  
261 fusion in the *E. pustulosus* lineage. *E. coqui* has experienced the most intense rearrangement,  
262 including Robertsonian fissions of A and G, a Robertsonian fusion of I/K, and a significant series  
263 of Robertsonian rearrangements involving B, E, F, and H that resulted in Bprox/H, Bdist/Fdist,  
264 and E/Fprox (**Table 1, Supplementary Table 8**). (Mechanistically, these “fissions” and “fusions”  
265 likely occur by translocations; for a discussion see ref.<sup>62</sup>.) Elements I and H form the two arms of  
266 a metacentric chromosome in pipids (**Fig. 3A**), and therefore the pipid ancestor, but are found  
267 as either independent acrocentric chromosomes (e.g., in *P. adspersus* and *L. ailaonicum*) or as  
268 arms of metacentrics formed by centric fusion with other elements (**Supplementary Table 8**).



269

270 We also observed end-to-end "fusions" of metacentric chromosomes, for example, the joining of  
271 D with K in *E. pustulosus*, and with element E in the common ancestor of pipids (*Hymenochirus*  
272 and *Xenopus*) (**Figs. 1 and 3C**). Since bicentric chromosomes are not stably propagated  
273 through mitosis, one of the two ancestral centromeres brought together by end-to-end fusion  
274 must be lost or inactivated, as shown in **Fig. 3C** for the ancient D-E fusion in pipids. We note  
275 that the D centromere persists in both end-to-end fusions involving D, suggesting that  
276 centromeres derived from different ancestral elements may be differentially susceptible to  
277 silencing.

278

279 Using the pericentromere and subtelomere repeat landscape as a proxy, we found several  
280 examples of end-to-end chromosome fusions in which residual subtelomeric signals are  
281 preserved near the presumptive junction (**Fig. 3, Supplementary Fig. 9**). These include the  
282 end-to-end fusion of *X. tropicalis*-like chromosomes 9 and 10 (elements L and M) to produce the  
283 Chr9\_10 progenitor of *X. laevis* that is found in both the L and S subgenomes of this  
284 allotetraploid<sup>20</sup>. These *X. laevis* chromosomes display evidence of decaying subtelomeric  
285 signatures in the region surrounding the ancestral L-M fusion (**Fig. 1 and Supplementary Fig.**  
286 **9A,B**). Similarly, enrichment of subtelomerically associated repeats is observed in *H. boettgeri*  
287 chromosome 8\_10 (**Supplementary Fig. 9C–E**) near the junction between the portions of the  
288 chromosome with M and J/K ancestry (the J/K fusion occurred near the base of pipids). In both  
289 cases, the centromere from element M (i.e., the centromere in *X. tropicalis* chromosome 9) is  
290 maintained after fusion. The inversion of the p-arm from Chr8S also has evidence of decaying  
291 sequence but the median is less than the median JC distance at the Chr9\_10 fusion, suggesting  
292 that the fusion preceded the inversion.

293

## 294 **Rate of karyotype change**

295 The long-range and, in most cases, chromosome-scale collinearity (**Supplementary Fig. 8**,  
296 **Supplementary Table 9**) among the frog species we examined, despite a combined branch  
297 length of 1.05 billion years (**Supplementary Tables 10 and 11**), parallels the synteny observed  
298 in birds<sup>63</sup> and reptiles<sup>64</sup> but differs from the substantial chromosome variation found in  
299 mammals<sup>15,31</sup>. Maintenance of collinear blocks may reflect an intrinsically slow rate of  
300 rearrangement in frogs, perhaps a consequence of large regions devoid of recombination, or  
301 selection favoring retention of specific gene order and chromosome structure related to  
302 chromosomal functions. We inferred a total of 17 fission, fusion, translocation, and duplication  
303 events (excluding smaller intra-chromosome rearrangements) resulting in a karyotype change  
304 every 62 million years (**Fig. 1**). This rate is similar to the rate of one chromosome-number  
305 change every 70 to 90 million years as previously proposed for frogs and mammals<sup>26,28</sup> but still  
306 slower than karyotype change rates for most mammals<sup>65</sup> and many reptiles<sup>66</sup>. Of course, our  
307 rate calculation is based on only seven species, and the rate may vary depending on the  
308 species analyzed. Some frog taxa, such as *Eleutherodactylus* spp. ( $2n = 16\text{--}32$ ) and  
309 *Pristimantis* spp.<sup>39</sup> ( $2n = 22\text{--}38$ ), have had a higher rate of karyotype change. On the other  
310 hand, some species, such as *Leptobrachium ailaonicum*, *L. leishanense*<sup>14</sup>, and *Rana*  
311 *temporaria*<sup>102</sup>, may have had no significant inter-chromosome changes over the past 205 million  
312 years (**Fig. 1**). Nonetheless, this analysis of chromosome variation across the frog lineage  
313 suggests a remarkably slow rate of karyotype evolution.

## 314 **Chromosome structure and conformation**

315 The stasis of *Xenopus* chromosomes relative to other frogs (see below) allows us to examine  
316 the repetitive landscape of chromosomes that are not frequently rearranged by translocation,  
317 and may be approaching a structural equilibrium.

318

## 319 **Centromeres, satellites, and pericentromeric repeats**

320 Vertebrate centromeres are typically characterized by tandem families of centromeric satellites  
321 (e.g., the alpha satellites of humans) that bind to the centromeric histone H3 protein, Cenp-a, a  
322 centromere-specific variant of histone H3<sup>53,67</sup>. Cenp-a binding satellites have been described in  
323 *X. laevis*<sup>68</sup>, and here we find distantly related *X. tropicalis* satellite sequences that also co-  
324 precipitate with Cenp-a. Thus, chromatin immunoprecipitation and sequencing (ChIP-seq)  
325 shows that Cenp-a binding coincides with the predictions of centromere positions derived from  
326 chromatin conformation analysis and repetitive content (**Supplementary Fig. 5A–C**,  
327 **Supplementary Tables 12 and 13**). Importantly, this concordance supports the prediction of  
328 centromere position for other species that we infer below. The Cenp-a bound-sequences are  
329 arrays of 205-bp monomers that share a mean sequence identity greater than 95% at the  
330 nucleotide level, with a specific segment of the repeating unit showing greatest variability  
331 (**Supplementary Fig. 10**). The *X. tropicalis* centromere sequence is different from centromeric-  
332 associated repeats found in *X. laevis*<sup>68,69</sup>, suggesting the sequences evolve rapidly after  
333 speciation but are maintained within the species.

334

335 All metacentric pericentromeric regions of *X. tropicalis* chromosomes are enriched in  
336 retrotransposable repetitive elements (15 Mb regions shown in **Fig. 2**). In other vertebrate  
337 species and *Drosophila*, retrotransposable elements from the pericentromeric regions are  
338 involved in the recruitment of constitutive heterochromatin components<sup>70,71</sup>. Among the  
339 pericentromerically enriched repeats we identified specific families belonging to LTR  
340 retrotransposons (Ty3), non-LTR retrotransposons (CR1, Penelope, and L1), and DNA  
341 transposable elements (PIF-Harbinger and piggyBac families) (**Fig. 2, Supplementary Fig. 5**).  
342 CR1 (CR1-2\_XT) is the most prevalent and it is among the youngest of all pericentromeric  
343 retrotransposons (mean Jukes-Cantor (JC) distance to consensus of 0.05). In contrast, L1 and  
344 Penelope types have a mean JC greater than 0.4 (**Supplementary Fig. 5**). The age of the

345 repeats, indirectly measured by the JC distance, suggests that pericentromeric retrotransposons  
346 have experienced different bursts of activity and tendency to insert near the centromere.  
347 Expression of active retrotransposons and random insertion can compromise chromosome  
348 stability, and because silencing of these is crucial, genomes develop mechanisms to rapidly  
349 silence them. Such insertions may be positively selected, and therefore amplified, to establish  
350 pericentromeric heterochromatin, but may be counter selected when they insert in gene rich  
351 chromosome arms.

352

### 353 **Recombination and extended subtelomeres**

354 Although meiotic recombination is distributed across chromosomes, it is enriched near the  
355 chromosome ends (**Supplementary Fig. 11A**). While in humans, meiotic recombination is  
356 suppressed close to centromeres and elevated near telomeres, recombination is still regularly  
357 distributed on chromosome arms<sup>72</sup>. Other groups, including birds and fish, experience most  
358 recombination events 5 Mb away from the telomeres and only modest recombination is  
359 observed outside those regions<sup>73–76</sup>. Binding events for the protein PRDM9, present in mouse,  
360 rat and human, mark recombination hotspots in the chromosome arms in these species<sup>77</sup>. Given  
361 that amphibians lack the *prdm9* gene<sup>78</sup>, we analyzed the genomic features that colocalized in  
362 areas prone to recombination.

363

364 We studied the distribution of recombination along *X. tropicalis* chromosomes using a previously  
365 generated Nigerian-Ivory Coast F<sub>2</sub> cross<sup>18</sup> (**Supplementary Note 5, Supplementary Data 2**).  
366 Half of the observed recombination is concentrated in only 160 Mb (11.0% of the genome) and  
367 90% of the observed recombination occurs in 540 Mb (37.3%). In contrast, the central regions of  
368 each chromosome are “cold”, with recombination rates below 0.5 cM/Mb (**Supplementary Fig.**  
369 **11B, Supplementary Table 14**). Strikingly, we find that (sex-averaged) recombination is

370 concentrated within just 30 Mb of the ends of each chromosome and occurs only rarely  
371 elsewhere (**Supplementary Fig. 11A**); the regions of the subtelomeres experiencing high  
372 recombination are nearly 6-fold larger than in non-amphibian genomes<sup>73,74</sup>. These rates of  
373 recombination were not previously determined, since the repeat-rich subtelomeres were absent  
374 from the assemblies, and markers that happened to lie in those regions showed insufficient  
375 linkage to be incorporated into the maps.

376

377 Due to the elevated recombination, and repeat structure discussed below, we defined the  
378 extended sub-telomeres as the terminal 30 Mb of all metacentric chromosomes, and terminal 30  
379 Mb excluding the 15 Mb surrounding the pericentromeric regions of acrocentric chromosomes  
380 (Chr3, Chr8, and Chr10) (**Fig. 2**). The median recombination rate in the extended subtelomeres  
381 (1.73 cM/Mb) is ten-fold higher than the median rate observed in the rest of the chromosome  
382 arms (0.16 cM/Mb). The recombination rate in the 5-Mb region surrounding the centromeric  
383 tandem repeats is even lower (0.04 cM/Mb). Since constitutive heterochromatin in  
384 pericentromeric regions is known to repress recombination, this observation is expected  
385 (reviewed in refs.<sup>79,80</sup>). However, the centromeres of acrocentric chromosomes lie within 30 Mb  
386 of the telomere, which precludes the extended sub-telomeric associated repeats (**Fig. 2** and  
387 **Supplementary Fig. 12A**).

388

389 We examined the relationship between rates of recombination against repetitive elements and  
390 sequence motifs associated with recombination hotspots in other vertebrate species  
391 (**Supplementary Fig. 13A, Supplementary Table 14**). Similar to chicken and zebra finch,  
392 recombination is the highest in subtelomeres and positively correlates with GC content<sup>73,76,81</sup>,  
393 which is consistent with GC-biased gene conversion<sup>82-84</sup> in recombinogenic regions (median GC  
394 = 42.5% in the 74 Mb in which half of the recombination occurs) vs. the non-recombinogenic  
395 centers of chromosomes (median 38.8%). As in zebra finch (**Supplementary Fig. 14**),

396 recombination in *X. tropicalis* is strongly correlated with satellite repeats (Pearson correlation =  
397 +0.68,  $R^2 = 0.457$ ). The high density of satellite repeats (**Supplementary Table 15**) in highly  
398 recombinogenic subtelomeric regions suggests that unequal crossing over during meiotic  
399 recombination mediates tandem repeat expansions<sup>85,86</sup>. Notably in the extended subtelomeric  
400 regions, tandem repeats are enriched in specific tetrameric sequences (TGGG, AGGG, and  
401 ACAG) compared to non-tandem repeats (**Supplementary Fig. 13B**). In contrast, centromeric  
402 tandem repeats are completely devoid of these short sequences.

403

404 Some of the tandem arrays enriched in the terminal 30 Mb from all chromosomes derive from  
405 portions of transposable elements such as SINE/tRNA-V, LINE/CR1, DNA/Kolobok-2  
406 (**Supplementary Fig. 12, Supplementary Table 16**). For example the minisatellite expansion  
407 that arose from the family of SINE/tRNA-V present in the pipid lineage<sup>87</sup> amplified a 52-bp  
408 portion of the 3'UTR-tail from the SINE/tRNA-V element in *Xenopus tropicalis* and other frog  
409 species (**Supplementary Table 17**). Although intact SINE/tRNA-V elements are distributed  
410 throughout the genome, the minisatellite fragment is only expanded in subtelomeric SINE/tRNA-  
411 Vs, suggesting that recombination in subtelomeres has driven minisatellite expansion  
412 (**Supplementary Figs. 12 and 15**). Interestingly, although the satellite expansions are similar in  
413 *X. laevis* and *X. tropicalis*, they differ in other frogs, suggesting that different satellite expansions  
414 can occur repeatedly during the maintenance of the long subtelomeric regions (see below).

415

#### 416 **Chromatin conformation correlates with cytogenetic features**

417 To further refine our understanding of chromosome structure in *X. tropicalis*, we studied  
418 chromatin conformation capture (“HiC”) data from nucleated blood cells. These experiments link  
419 short reads representing sequences in close three-dimensional proximity<sup>88</sup>. **Fig. 4** shows  
420 mapped HiC read pairs for chromosomes 1 and 2, with different minimum mapping quality

421 thresholds above and below the diagonal (**Fig. 4** and **Supplementary Fig. 2, Supplementary**  
422 **Note 5**). We consistently observe a “wing” of intra-chromosome contacts transverse to the main  
423 diagonal, which (1) intersects the main diagonal near the cytogenetically defined, Cenp-a-  
424 binding centromere, and (2) indicates contacts between p and q arms (**Supplementary Figs. 2**  
425 **and 16**). These observations imply that interphase chromosomes are “folded” at their  
426 centromeres, with contacts between distal arms. We also observe inter-chromosome contacts  
427 among centromeres of different chromosomes and between their telomeres (**Supplementary**  
428 **Fig. 10A**).

429  
430 Taken together, these intra- and inter-chromosome contacts are consistent with a Rabl  
431 configuration of chromosomes<sup>89,90</sup> in *Xenopus* blood cells. This configuration is understood as a  
432 relict structure from the previous mitosis<sup>91,92</sup>, in which the chromosomes have become  
433 elongated and telomeres clustered on the nuclear membrane. Associations between  
434 centromeres and between telomeres, first observed in salamander embryos<sup>89</sup>, are also  
435 observed in other animals<sup>93,94</sup>, fungi<sup>95</sup>, and plants<sup>96–98</sup>. These findings suggest that remnants of  
436 this ‘Rabl configuration’<sup>89</sup> may be a common feature of post-mitotic cells across a wide range of  
437 eukaryotes. Here, we quantified the degree to which chromosomes are compacted in the Rabl  
438 configuration using HiC data and find that, with the exception of blood cell nuclei (sum of  
439 squared distances (SSD) 1.465), chromosomes from early frog development (NF stages 8 to  
440 23) appear more tightly constrained (mean SSD 1.384) in Rabl configuration than the more  
441 specialized (liver and brain) adult tissues and sperm (mean SSD 5.583; **Supplementary Fig.**  
442 **16, Supplementary Table 18, Supplementary Note 5**). Although it is possible some amount of  
443 HiC signal may be due to residual incompleteness in the assembly and concomitant  
444 mismapping of reads to repeat sequences, these observations are robust to quality filtering,  
445 even when using single-copy sequences. Furthermore, such contacts are weakest in sperm<sup>16</sup>, a

446 control that argues strongly against sequence mismapping artefacts (**Supplementary Fig. 10B,**  
447 **Supplementary Note 5).**

448

449 We also observed three-dimensional associations between pericentromeric regions of different  
450 chromosomes, based on enriched HiC contacts<sup>90,99</sup> (**Fig. 4**). As with the Rab1 signal, these  
451 “contacts” are accentuated when HiC reads are allowed to map permissively (**Methods**), which  
452 suggests that they may be influenced by common repetitive pericentromeric sequences shared  
453 among chromosomes. The signal persists in weaker form with more stringent read mapping,  
454 however, and either represents *bona fide* signal or residual incompleteness of the  
455 pericentromeric assembly. Notably, the correlation between centromere position and the  
456 observed intra-chromosome folding and inter-chromosome contacts at centromeres allows us to  
457 use HiC analysis and principal component analysis (PCA) of intra- and inter-chromosome  
458 contacts<sup>97</sup> to infer the likely centromeric positions based purely on HiC data in frogs whose  
459 cytogenetics are less well-studied (see below).

460

### 461 **Chromatin compartments**

462 Chromatin contacts in human<sup>88,100,101</sup>, mouse<sup>101</sup>, chicken<sup>102</sup> and other phylogenetically diverse  
463 species<sup>103–105</sup> often show a characteristic checkerboard pattern that is superimposed on the  
464 predominant near-diagonal signal. This pattern implies an alternating ‘A/B’ compartment  
465 structure with enriched intra-compartment contacts within chromosomes (**Fig. 5A**), which has  
466 been linked with G-banding in humans<sup>106</sup>. *X. tropicalis* also exhibits an A/B compartment  
467 pattern, which emerges as alternating gene rich (‘A’) and gene poor (‘B’) regions (median 19.99  
468 genes/Mb in A and 9.99 genes/Mb in B) (**Fig. 5B**). A/B compartments are also differentiated by  
469 repetitive content<sup>101</sup>, with A-compartment domains showing slight enrichment (1.21–1.44 fold) in  
470 DNA transposons of the DNA/Kolobok-T2, DNA/hAT-Charlie, and Mariner-Tc1 families. B-



471 compartment domains had significantly higher enrichment for DNA transposons (DNA/hAT-Ac,  
472 Mar-Tigger) and retrotransposons (Ty3/metaviridae and CR1), among other repeats (1.12–2.11  
473 fold) (**Fig. 5C**). The association between repeats overrepresented in A and B compartments is  
474 also captured in one of the principal components obtained from the repeat densities of all  
475 chromosomes (**Supplementary Note 5**); we detect a modest negative correlation ( $R = -0.44$ )  
476 between the HiC eigenvectors that classified A/B compartments and the third principal  
477 component eigenvectors obtained from the repeat density matrix (**Supplementary Fig. 5B**).  
478 The association between chromatin condensation and repeat type could be due to a preference  
479 for certain transposable elements to insert in specific chromatin contexts, or chromatin  
480 condensation to be controlled in part by transposable element content, or a combination of  
481 these factors. However, we were unable to find any correlation of AB compartments with the G-  
482 banding of condensed chromosomes in *X. tropicalis*<sup>107,108</sup>.

483

#### 484 **Higher-order interactions**

485 Chromatin conformation contacts also provide clues to the organization of chromosomes within  
486 the nucleus. We observe non-random ( $\chi^2(81, n = 24,987,749) = 3,049,787; p < 2.2 \times 10^{-308}$ )  
487 associations between chromosomes in blood cell nuclei (**Fig. 4B, Supplementary Tables 19**  
488 **and 20**): (a) chromosome 1 is enriched for contacts with chromosomes 2–8 (mean 1.05×  
489 enrichment), and depleted of contacts with 9 and 10 (mean 0.89×); (b) among themselves,  
490 chromosomes 2–8 show differential contact enrichment or depletion; and (c) chromosomes 9  
491 and 10 are enriched (1.17×) for contacts with one another but are depleted with respect to all  
492 other chromosomes. These observations suggest the presence of distinct chromosome  
493 territories<sup>89,109–111</sup>, where chromosomes 2–8 localized more proximal to—and arrayed around—  
494 chromosome 1, with chromosomes 9 and 10 relatively sequestered from chromosome 1 (**Fig.**  
495 **4C**). The contact enrichment between chromosomes 9 and 10 is particularly notable because

496 these short chromosomes (91.2 and 52.4 Mb, respectively) have become fused in the *X. laevis*  
497 lineage<sup>112</sup>, which might have been enabled by their persistent nuclear proximity<sup>113</sup>.  
498  
499 Between chromosomes, p-p and q-q arm interactions exhibit a small but significant enrichment  
500 (1.059× enrichment;  $\chi^2(1, n = 24,786,496) = 17,037$ ;  $p < 2.2 \times 10^{-308}$ ) over p-q arm contacts. This  
501 is a general feature of metacentric and sub-metacentric chromosomes also observed in other  
502 frog genomes (see below), except *E. coqui* (0.928× enrichment;  $\chi^2(1, n = 6,850,547) = 3,914$ ;  $p$   
503  $< 2.2 \times 10^{-308}$ ), the chromosomes of which are predominantly acrocentric. Finally, the p-arms of  
504 chromosomes 3, 4, 8, and 9 are enriched for contacts with chromosome 10, with the sub-  
505 metacentric chromosomes 3 and 8 showing the strongest enrichment (and a slight preference  
506 between p-arms). The q-arms of chromosomes 3 and 8, however, exhibit a slight enrichment for  
507 contacts with chromosomes 1, 2, 4, and 5. Taken together, these observations suggest  
508 colocalization of the p and q arms of chromosomes 3 and 8 in blood cell nuclei.  
509

## 510 Conclusions

511 Anuran amphibians play a central role in biology, not simply as a globally distributed animal  
512 taxon, but also as key subjects for research in areas that range from ecology and evolution to  
513 cell and developmental biology. The genomic resources generated here will thus provide  
514 important tools for further studies. Given the crucial role of *X. tropicalis* for genomic analysis of  
515 development and regeneration<sup>114,115</sup>, the improvements to our understanding of its genome  
516 reported here will provide a more finely grained view of biomedically important genetic and  
517 epigenetic mechanisms. This new genome is also important from the standpoint of evolutionary  
518 genomics, as comparisons between the genomes of *X. tropicalis* and *X. laevis* shed light on  
519 mechanisms of genome duplication<sup>115</sup>. The new genome described here for *H. boettgeri*,  
520 another pipid frog, is also significant in this regard, as it enables an interesting comparison of

521 *Xenopus* genomes to that of a closely related outgroup. Moreover, the genomes of *E. coqui* and  
522 *E. pustulosus* provide a foundation for future studies of the evolution of ontogenies and of their  
523 underlying developmental mechanisms, as *E. coqui* is a direct-developing frog with no tadpole  
524 stage<sup>116</sup> and *E. pustulosus*, a foam-nesting frog, is a model for studying mating calls and female  
525 mate choice<sup>116</sup>. In addition to their interesting life histories, both frogs display interesting  
526 patterns of gastrulation<sup>117,118</sup>. Finally, recent work has demonstrated the efficacy of genetic or  
527 genomic analysis for understanding the impact of chytrid fungus on various amphibian  
528 species<sup>119</sup>. A deeper and broader understanding of amphibian genomes will be useful in the  
529 context of the global decline of amphibian populations<sup>120,121</sup>.

530

## 531 Online Methods

### 532 Genomic extraction and sequencing.

533 High molecular weight DNA was extracted from blood of an F<sub>17</sub> *Xenopus tropicalis* Nigerian  
534 strain female (ref.<sup>18</sup>; **Supplementary Note 1**). Paired-end (PE) Illumina shotgun libraries were  
535 constructed by the QB3 Functional Genomics Laboratory (FGL) and sequenced on an Illumina  
536 HiSeq 2500 as 2×250 bp reads at the Vincent J. Coates Genomics Sequencing Lab (VCGSL) at  
537 the University of California, Berkeley. Single-molecule real-time (SMRT) continuous long-read  
538 (CLR) sequencing was performed at the HudsonAlpha Institute for Biotechnology on PacBio  
539 RSII machines with P6-C4 chemistry (**Supplementary Note 1, Supplementary Data 1**). 10x  
540 Genomics Chromium linked-read sequencing was carried out at HudsonAlpha on HiSeq XTen  
541 (**Supplementary Note 1**).

542

### 543 *Xenopus tropicalis* genome assembly and annotation.

544 Chromium linked reads (10x Genomics) were assembled with Supernova<sup>122</sup> (v1.1.5). This  
545 assembly was used to seed the assembly of continuous long reads (PacBio) using DBG2OLC<sup>123</sup>

546 (commit 1f7e752). An independent PacBio-only assembly was constructed with Canu<sup>124</sup> (v1.6-  
547 132-gf9284f8). These two assemblies were combined, or metassembled, using MUMmer<sup>125</sup>  
548 (v3.23) and quickmerge<sup>126</sup> commit e4ea490 (**Supplementary Fig. 1A, Supplementary Note 2**).  
549 Residual haplotypic redundancy was identified and removed (**Supplementary Fig. 1B,**  
550 **Supplementary Note 2**). The non-redundant metassembly was scaffolded with Sanger paired-  
551 ends and BAC-ends<sup>33</sup> using SSPACE<sup>127</sup> v3 and HiC using 3D-DNA<sup>94,128</sup> commit 2796c3b, then  
552 manually curated in JuiceBox<sup>129,130</sup> v1.9.0 (**Supplementary Note 2**). The assembly was  
553 polished with Arrow<sup>131</sup>, Pilon<sup>132</sup> v1.23, and then FreeBayes<sup>133</sup> (v1.1.0-54-g49413aa) with ILEC  
554 (map4cns; <https://bitbucket.org/rokhsar-lab/map4cns>). The genome was annotated with the  
555 DOE-JGI Integrated Gene Call pipeline<sup>134</sup> (IGC) using transcript assemblies (TAs) generated  
556 with Trinity<sup>135,136</sup> v2.5.1 from multiple developmental stages and tissues (**Supplementary Data**  
557 **1, Supplementary Note 2**). RepeatModeler<sup>137</sup> v1.0.11 was run on all frog species. The frog and  
558 ancestral repeat libraries from RepBase<sup>138</sup> v23.12 were combined with the repeats consensus  
559 identified by Repeat Modeler. The merged repeat library was used to annotate repeats of all  
560 frogs with RepeatMasker<sup>139</sup> v4.0.7 (**Supplementary Notes 2 and 3**).

561

### 562 ***Hymenochirus boettgeri* metaphase chromosome spread.**

563 Stage 26 tadpoles ( $n = 10$ ) were incubated at room temperature in 0.01% colchicine and 1×  
564 MMR for 4–6 hr. After removing the yolky ventral portion of the tadpoles, the remaining dorsal  
565 portions were pooled together in deionized water and allowed to stand for 20 min. The dorsal  
566 portions were transferred to 0.2 mL of 60% acetic acid in deionized water and allowed to stand  
567 for 5 min. The tissue was then pipetted onto a positively charged microscope slide, and excess  
568 acetic acid was blotted away. To flatten the tissue and promote chromosome spreading, the  
569 slide was covered with a coverslip and a lead brick was placed on top of it for 5 min. The slide  
570 and coverslip were then placed on dry ice for 5 min. The coverslip was removed from the frozen  
571 slide, and the slide was stained with 0.1 mg/mL Hoechst Stain solution for 5 min. A fresh

572 coverslip was then mounted on the slide using VectaShield, and the edges were sealed with nail  
573 polish. Chromosomes in metaphase spreads (**Supplementary Fig. 7A**) were imaged on an  
574 Olympus BX51 Fluorescence Microscope run with Metamorph software using a 60× oil  
575 objective. Chromosome number was counted in 75 separate metaphase spreads.

576

### 577 **Genome and transcriptome sequencing of five pipanurans.**

578 Illumina PE 10x Genomics Chromium linked-read whole-genome libraries for *E. pustulosus*  
579 (from liver), *E. coqui* (from blood) and *H. boettgeri* (from liver) were sequenced on an HiSeq X at  
580 the HudsonAlpha Institute for Biotechnology. PacBio SMRT Sequel I CLR data were generated  
581 at UC Davis DNA Technologies and Expression Analysis Core for each of *E. pustulosus* and *H.*  
582 *boettgeri* from liver samples. In addition, two TruSeq Illumina PE libraries (from kidney) and two  
583 Nextera mate-pair libs (from liver) for *E. coqui* were prepared. HiC chromatin conformation  
584 capture libraries were prepared for *H. boettgeri*, *E. pustulosus*, and *E. coqui* using the  
585 Dovetail™ HiC Kit for Illumina following the “Animal Tissue Samples” protocol. HiC libraries  
586 were sequenced on the Illumina HiSeq 4000 by the VCGSL.

587

588 Illumina TruSeq Stranded mRNA Library Prep Kit libraries were prepared from *E. pustulosus*  
589 stages 45 and 56 whole tadpoles (gut excluded) and various adult tissues dissected from frogs  
590 maintained at the University of the Pacific. Brain ( $n = 3$ ), dorsal skin ( $n = 2$ ), eggs ( $n = 2$ ), eye ( $n$   
591  $= 2$ ), heart ( $n = 2$ ), intestine ( $n = 2$ ), larynx ( $n = 3$ ), liver ( $n = 2$ ), lung ( $n = 2$ ), and ventral skin ( $n =$   
592  $2$ ) samples were washed twice with PBS, homogenized in TRIzol Reagent, and centrifuged,  
593 followed by flash freezing of the supernatant. RNA was isolated following the *TRIzol Reagent*  
594 *User Guide* (Pub. No. MAN0001271 Rev. A.0) protocol. In addition, *H. boettgeri* eggs were  
595 homogenized in TRIzol Reagent and processed according to manufacturer's instructions. RNA  
596 was then isolated using the QIAGEN RNeasy Mini Kit (cat 74104). An Illumina mRNA library  
597 was prepared using the Takara PrepX RNA-Seq for Illumina Library Kit by the Functional

598 Genomics Laboratory at the University of California Berkeley. All libraries were sequenced at  
599 the VCGSL on an HiSeq 4000 as 151 bp PE reads. See **Supplementary Note 3** for additional  
600 details about DNA/RNA extractions and library preparations, and **Supplementary Data 1** for a  
601 complete list of DNA/RNA sequencing data generated for *E. coqui*, *E. pustulosus*, and *H.*  
602 *boettgeri*.

603

#### 604 **Assembly and annotation of five pipanuran genomes.**

605 Contigs were assembled with Supernova<sup>122</sup> v2.0.1 (*E. pustulosus* and *H. boettgeri*) or  
606 Meraculous<sup>140,141</sup> v2.2.4 (*E. coqui*). For *E. coqui*, residual haplotypic redundancy was removed  
607 using custom scripts (<https://github.com/abmudd/Assembly>) prior to scaffolding with SSPACE<sup>127</sup>  
608 (v3.0). *E. pustulosus* and *H. boettgeri* contigs were ordered and oriented using MUMmer<sup>125</sup>  
609 (v3.23) alignments to PBEC-polished (map4cns commit dd89f52; [https://bitbucket.org/rokhsar-](https://bitbucket.org/rokhsar-lab/map4cns)  
610 [lab/map4cns](https://bitbucket.org/rokhsar-lab/map4cns)) DBG2OLC<sup>123</sup> (commit 1f7e752) hybrid contigs (**Supplementary Note 3**). All three  
611 assemblies were scaffolded further with linked-reads and Scaff10X (v2.1;  
612 <https://sourceforge.net/projects/phusion2/files/scaff10x>).

613

614 *E. pustulosus* and *H. boettgeri* chromosome-scale scaffolds were constructed with Dovetail  
615 Genomics HiC via the HiRise scaffolder<sup>142</sup>, followed by manual curation in JuiceBox<sup>128–130</sup>  
616 v1.9.0. Due to the fragmented nature of the *E. coqui* assembly, initial chromosome-scale  
617 scaffolds were first constructed by synteny with *E. pustulosus*, then refined in JuiceBox<sup>128–130</sup>  
618 v1.9.0. Gaps in the *E. pustulosus* and *H. boettgeri* assemblies bridged by PacBio reads were  
619 resized using custom scripts (pbGapLen; <https://bitbucket.org/bredeson/artisanal>) and filled with  
620 PBJelly<sup>143</sup> (PBSuite v15.8.24). These two assemblies were polished with FreeBayes and ILEC  
621 (map4cns commit dd89f52; <https://bitbucket.org/rokhsar-lab/map4cns>). A final round of gap-  
622 filling was then performed on the three assemblies using Platanus<sup>144</sup> (v1.2.1).

623

624 Previously published *L. ailaonicum*<sup>23</sup> (GCA\_018994145.1) and *P. adspersus*<sup>21</sup>  
625 (GCA\_004786255.1) assemblies were manually corrected in JuiceBox<sup>128–130</sup> (v1.11.08) using  
626 their respective HiC and Chicago data (**Supplementary Data 1**). Gaps in the corrected *P.*  
627 *adspersus* scaffolds were resized with PacBio reads (as described above) and filled using  
628 Platanus<sup>144</sup> (v1.2.1) with published TruSeq Illumina data obtained from NCBI (PRJNA439445).  
629 As described elsewhere<sup>145</sup>, all assemblies were screened for contaminants prior to scaffolding,  
630 and only final scaffolds and contigs longer than 1 kb were retained for downstream analyses.  
631 More details on assembly procedures can be found in (**Supplementary Note 3**).

632  
633 Genomic repeats in all five species were annotated with RepeatMasker<sup>137,139</sup> (v4.0.7 and v4.0.9)  
634 using the repeat library generated above. Protein-coding genes were annotated for *E. coqui*, *E.*  
635 *pustulosus*, *H. boettgeri*, and *P. adspersus* using the IGC<sup>134</sup> pipeline with homology and  
636 transcript evidence. For each respective species, newly generated RNA-seq data were  
637 combined with public *H. boettgeri*<sup>20</sup> (BioProject PRJNA306175) and *P. adspersus*<sup>21</sup> (BioProject  
638 PRJNA439445) data, and unpublished *E. coqui* data (stages 7, 10, and 13 hindlimb [Harvard  
639 University]; stage 9–10 tail fin skin [French National Center for Scientific Research]). Transcript  
640 assemblies used as input to IGC were assembled with Trinity<sup>135,136</sup> (v2.5.1) and filtered using the  
641 heuristics described in **Supplementary Note 3**.

642  
643 **Synteny and ancestral chromosome inference.**

644 One-to-one gene ortholog set between frog proteomes was obtained from the output from  
645 OrthoVenn2<sup>52</sup> using an E-value of  $1 \times 10^{-5}$  and an inflation value of 1.5 (**Supplementary Note 4**).  
646 The assemblies of all frog species and axolotl were pairwise aligned against the *X. tropicalis*  
647 genome using cactus<sup>146</sup> (commit e4d0859) (**Supplementary Note 4**). Pairwise collinearity runs  
648 were merged into runs of collinearity with ROAST/MULTIZ<sup>147</sup> (v012109) using the phylogenetic  
649 topology from TimeTree<sup>148</sup> and sorted with last<sup>149</sup> (v979) (**Supplementary Note 4**).



650

651 **Phylogeny and estimation of sequence divergence.**

652 Fourfold degenerate bases of one-to-one orthologs were obtained and reformatted from the  
653 MAFFT alignment as described in Mudd et al.<sup>145</sup> (**Supplementary Note 4**). The maximum-  
654 likelihood phylogeny was obtained with RAxML<sup>150</sup> (v8.2.11) using the GTR+Gamma model of  
655 substitution with outgroup *Ambystoma mexicanum*. Divergence times were calculated with  
656 MEGA7<sup>151</sup> (v7.0.26) with the GTR+Gamma model of substitution using Reltime method<sup>152</sup>.

657

658 **Chromosome evolution.**

659 Customized scripts<sup>145</sup> were used to extract pairwise alignments from the ROAST-merged MAF  
660 file and converted into runs of collinearity. The runs of collinearity were visualized with Circos<sup>153</sup>  
661 (v0.69-6) (**Supplementary Note 4**).

662

663 **Centromeres, satellites, and pericentromeric repeats.**

664 Tandem repeats were called using Tandem Repeat Finder<sup>57</sup> (trf genome.fa 2 5 7 80 10 50 2000  
665 -l 6 -d -ngs). To identify tandem repeats enriched in pericentromeric and subtelomeric regions,  
666 we extracted the monomer sequences of all tandem repeats overlapping the region of interest.  
667 A database of non-redundant monomers was created by making a dimer database. Dimers  
668 were clustered with BlastClust<sup>154</sup> v2.2.26 (-S 75 -p F -L 0.45 -b F -W 10). A non-redundant  
669 monomer database was created using the most common monomer size from each cluster. The  
670 non-redundant sequences were mapped to the genome with BLASTN<sup>155</sup> (-outfmt 6 -evalue  
671 1e3). The enriched monomeric sequences in centromeres and subtelomeres were identified by  
672 selecting the highest normalized ratios of tandem sequence footprints in the region of interest  
673 over the remaining portions of the genome. For more detail, see **Supplementary Note 5**.

674



675 **Genetic variation.**

676 Reads were aligned with BWA-MEM<sup>156</sup> (v0.7.17-r1188) and alignments were processed using  
677 SAMtools<sup>157</sup> (v1.9-93-g0ca96a4), keeping only properly paired reads (samtools view -f3 -F3852)  
678 for variant calling. Variants were called with FreeBayes<sup>133</sup> (v1.1.0-54-g49413aa; --standard-  
679 filters --genotype-qualities --strict-vcf --report-monomorphic). Only bi-allelic SNPs with depth  
680 within mode  $\pm 1.78$ SDs were retained. An allele-balance filter [0.3–0.7] for heterozygous  
681 genotypes was also applied. Segmental heterozygosity/homozygosity were estimated using  
682 windows of 500 kb with 50-kb step using BEDtools<sup>158</sup> (v2.28.0) for pooled samples or snvrate<sup>159</sup>  
683 (v2.0; <https://bitbucket.org/rokhsar-lab/wgs-analysis>). For more detail, see **Supplementary**

684 **Note 2.**

685

686 **GC-content, gene, and repeat landscape.**

687 GC-content percentages were calculated in 1-Mb bins sliding every 50 kb. Gene densities were  
688 obtained using a window size of 250 kb sliding every 12.5 kb. The repeat density matrix for *X.*  
689 *tropicalis* was obtained by counting base pairs per 1 Mb (sliding every 200 kb) covered by  
690 repeat families and classes of repeats. The principal component analysis (PCA) was performed  
691 on the density matrix composed of 7,253 1-Mb bins and 3,070 repeats (**Supplementary Note**  
692 **5**). The first (PC1) and second (PC2) components were smoothed using a cubic spline method.

693

694 **Chromatin immunoprecipitation.**

695 *Xenopus tropicalis* XTN-6 cells (Gorbsky and Horb, unpublished) were grown in 70% calcium-  
696 free L-15 (US Biologicals cat# L2101-02-50L), pH 7.2/10% Fetal Bovine Serum/Penicillin-  
697 Streptomycin (Invitrogen cat# 15140-163) at RT. Native MNase ChIP-seq protocol performed as  
698 described previously in Smith et al.<sup>69</sup>. Approximately 40 million cells were trypsinized and  
699 collected; nuclei were isolated by dounce extraction and collected with a sucrose cushion.  
700 Chromatin was digested to mononucleosomes by MNase. Nuclei were lysed and soluble

701 nucleosomes were extracted overnight at 4 °C. Extracted mononucleosomes were precleared  
702 with Protein A dynabeads (Invitrogen cat# 100-02D) for at least 4 h at 4 °C. A sample was taken  
703 for input after preclearing. Protein A dynabeads were bound to 10- µg antibody (either Rb-anti-  
704 XI Cenp-a, cross-reactive with *X. tropicalis*, Rb-anti-H4 Abcam cat# 7311 or Rb-anti-H3 Abcam  
705 cat# 1791) and incubated overnight with precleared soluble mononucleosomes at 4 °C.  
706 Dynabeads bound to Rabbit IgG antibody (Jackson ImmunoResearch cat#011-000-003) were  
707 collected with a magnet and washed three times with TBST (0.1% Triton X-100) before elution  
708 with 0.1% SDS in TE and proteinase K incubation at 65 °C with shaking for at least 4 h. Isolated  
709 and input mononucleosomes were size-selected using Ampure beads (Beckman cat# A63880)  
710 and prepared for sequencing using the NEBNext ultra ii DNA library prep kit for Illumina (NEB  
711 cat# E7654). Three replicates were sequenced on an Illumina HiSeq 4000 lane 2×150 bp by the  
712 Stanford Functional Genomics Facility. PE reads were trimmed with Trimmomatic<sup>160</sup> v0.39  
713 filtering for universal Illumina primers and for Nextera-PE indices. Processed PE reads were  
714 mapped with minimap2 (ref.<sup>161</sup>) v2.17-r941 against the unmasked genome reference.  
715 Samtools<sup>157</sup> v1.9 was used for sorting and indexing the alignment. Read counts (MapQ0) per  
716 10-kb bin (non-overlapping) for all samples were calculated with multiBamSummary from  
717 deeptools<sup>162</sup> v3.3.0. Read counts were normalized by the total number of counts in the  
718 chromosomes per sample (**Supplementary Note 5**).

719

## 720 **Recombination and extended subtelomeres.**

721 The reads from the F<sub>2</sub> mapping population<sup>18</sup> were aligned to the v10 genome using BWA-  
722 MEM<sup>156</sup> (v0.7.17-r1188). Variants were called using FreeBayes<sup>133</sup> (v1.1.0-54-g49413aa; --  
723 standard-filters --genotype-qualities --strict-vcf). SNPs were filtered, and valid F<sub>2</sub> mapping sites  
724 were selected when the genotypes of the Nigerian F<sub>0</sub> and the ICB F<sub>0</sub> were fixed and different  
725 and there was a depth of at least 10 for each F<sub>0</sub> SNP. Maps were calculated using JoinMap<sup>163</sup>  
726 v4.1 (**Supplementary Note 5, Supplementary Data 2**). The variation on the linkage map was

727 smoothed using the cubic spline function calculated every 500 kb. The Pearson correlation  
728 coefficient was calculated between recombination rates and genomic features that include GC  
729 content, repeat densities, and densities of reported CTCF and recombination hotspots<sup>164,165</sup>.

730

### 731 **Chromatin conformations and higher-order interactions.**

732 HiC read pairs were mapped with Juicer<sup>128</sup> (v1.5.6) and observed counts were extracted at 1 Mb  
733 resolution with JuicerTools. Centromeres were estimated manually in JuiceBox<sup>129</sup> and refined  
734 with Centurion<sup>99</sup> v0.1.0-3-g985439c using ICE-balanced MapQ0 matrices  
735 (<https://bitbucket.org/rokhsar-lab/xentr10/src/master/hic>). Rabl chromatin structure was visualized  
736 with PCA from Knight-Ruiz<sup>166</sup>-balanced MapQ30 matrices, and significance estimated by  
737 permutation testing using custom R scripts. Rabl constraint between p- and q-arms was  
738 measured as the sum of square distances (SSD) in PC1-PC2 dimensions, calculated between  
739 non-overlapping bins traveling sequentially away from the centromere. Inter-/intra-chromosomal  
740 contact enrichment analyses were quantified from MapQ30 matrices using  $\chi^2$  tests in R<sup>167</sup> v3.5.0  
741 (**Supplementary Note 5**; <https://bitbucket.org/rokhsar-lab/xentr10/src/master/hic>).

742

### 743 **A/B compartments.**

744 A/B compartments were called with custom R<sup>167</sup> (v3.5.0) scripts from Knight-Ruiz-balanced  
745 (observed / expected normalized) MapQ30 HiC contact correlation matrices generated with  
746 Juicer<sup>128</sup> (**Supplementary Note 5**). Pearson's correlation between eigenvectors of PC1 from the  
747 HiC correlation matrix and gene density were used to designate A and B compartments per  
748 chromosome.

749

## 750 Data Availability

751 The assemblies, annotations, and raw data are deposited in NCBI for v10 *X. tropicalis*  
752 (BioProjects PRJNA577946 and PRJNA726269), *E. coqui* (BioProject PRJNA578591), *E.*  
753 *pustulosus* (BioProject PRJNA578590), *H. boettgeri* (BioProject PRJNA578589), *L. ailaonicum*  
754 (BioProject PRJNA578588), and *P. adspersus* (BioProject PRJNA578592).

755

## 756 Code Availability

757 All custom scripts used in this work can be found at <https://bitbucket.org/rokhsar-lab/xentr10> and  
758 <https://github.com/abmudd/Assembly>.

759

## 760 References

- 761 1. Cannatella, D. C. & de Sá, R. O. *Xenopus laevis* as a model organism. *Syst. Biol.* **42**, 476–  
762 507 (1993).
- 763 2. Beetschen, J. C. How did urodele embryos come into prominence as a model system? *Int.*  
764 *J. Dev. Biol.* **40**, 629–636 (1996).
- 765 3. Brown, D. D. A tribute to the *Xenopus laevis* oocyte and egg. *J. Biol. Chem.* **279**, 45291–  
766 45299 (2004).
- 767 4. Harland, R. M. & Grainger, R. M. *Xenopus* research: metamorphosed by genetics and  
768 genomics. *Trends Genet.* **27**, 507–515 (2011).
- 769 5. Gurdon, J. B. & Hopwood, N. The introduction of *Xenopus laevis* into developmental  
770 biology: of empire, pregnancy testing and ribosomal genes. *Int. J. Dev. Biol.* **44**, 43–50  
771 (2000).
- 772 6. Blaustein, A. R. & Dobson, A. A message from the frogs. *Nature* **439**, 143–144 (2006).

- 773 7. Farrer, R. A. *et al.* Multiple emergences of genetically diverse amphibian-infecting chytrids  
774 include a globalized hypervirulent recombinant lineage. *Proc. Natl. Acad. Sci. U. S. A.* **108**,  
775 18732–18736 (2011).
- 776 8. Whiles, M. R. *et al.* Disease-driven amphibian declines alter ecosystem processes in a  
777 tropical stream. *Ecosystems* **16**, 146–157 (2013).
- 778 9. Gomes, A. *et al.* Bioactive molecules from amphibian skin: their biological activities with  
779 reference to therapeutic potentials for possible drug development. *Indian J. Exp. Biol.* **45**,  
780 579–593 (2007).
- 781 10. McCallum, M. L. Amphibian decline or extinction? Current declines dwarf background  
782 extinction rate. *hpet* **41**, 483–491 (2007).
- 783 11. Ryan, M. J., Fox, J. H., Wilczynski, W. & Rand, A. S. Sexual selection for sensory  
784 exploitation in the frog *Physalaemus pustulosus*. *Nature* **343**, 66–67 (1990).
- 785 12. Romero-Carvajal, A. *et al.* Embryogenesis and laboratory maintenance of the foam-nesting  
786 túngara frogs, genus *Engystomops* (= *Physalaemus*). *Dev. Dyn.* **238**, 1444–1454 (2009).
- 787 13. Miller, K. E., Session, A. M. & Heald, R. Kif2a scales meiotic spindle size in *Hymenochirus*  
788 *boettgeri*. *Curr. Biol.* **29**, 3720–3727.e5 (2019).
- 789 14. Minsuk, S. B. & Keller, R. E. Surface mesoderm in *Xenopus*: a revision of the stage 10 fate  
790 map. *Dev. Genes Evol.* **207**, 389–401 (1997).
- 791 15. Ferguson-Smith, M. A. & Trifonov, V. Mammalian karyotype evolution. *Nat. Rev. Genet.* **8**,  
792 950–962 (2007).
- 793 16. Zhang, G. *et al.* Comparative genomics reveals insights into avian genome evolution and  
794 adaptation. *Science* **346**, 1311–1320 (2014).
- 795 17. Kiazim, L. G. *et al.* Comparative mapping of the macrochromosomes of eight avian species  
796 provides further insight into their phylogenetic relationships and avian karyotype evolution.  
797 *Cells* **10**, (2021).
- 798 18. Mitros, T. *et al.* A chromosome-scale genome assembly and dense genetic map for

- 799 *Xenopus tropicalis*. *Dev. Biol.* **452**, 8–20 (2019).
- 800 19. Niu, L. *et al.* Three-dimensional folding dynamics of the *Xenopus tropicalis* genome. *Nat.*  
801 *Genet.* **53**, 1075–1087 (2021).
- 802 20. Session, A. M. *et al.* Genome evolution in the allotetraploid frog *Xenopus laevis*. *Nature*  
803 **538**, 336–343 (2016).
- 804 21. Denton, R. D., Kudra, R. S., Malcom, J. W., Du Preez, L. & Malone, J. H. The African  
805 Bullfrog (*Pyxicephalus adspersus*) genome unites the two ancestral ingredients for making  
806 vertebrate sex chromosomes. *Cold Spring Harbor Laboratory* 329847 (2018)  
807 doi:10.1101/329847.
- 808 22. Li, J. *et al.* Genomic and transcriptomic insights into molecular basis of sexually dimorphic  
809 nuptial spines in *Leptobrachium leishanense*. *Nat. Commun.* **10**, 5551 (2019).
- 810 23. Li, Y. *et al.* Chromosome-level assembly of the mustache toad genome using third-  
811 generation DNA sequencing and Hi-C analysis. *Gigascience* **8**, (2019).
- 812 24. Lu, B. *et al.* A large genome with chromosome-scale assembly sheds light on the  
813 evolutionary success of a true toad (*Bufo gargarizans*). *Mol. Ecol. Resour.* **21**, 1256–1273  
814 (2021).
- 815 25. Sun, Y.-B., Zhang, Y. & Wang, K. Perspectives on studying molecular adaptations of  
816 amphibians in the genomic era. *Zool Res* **41**, 351–364 (2020).
- 817 26. Wilson, A. C., Sarich, V. M. & Maxson, L. R. The importance of gene rearrangement in  
818 evolution: evidence from studies on rates of chromosomal, protein, and anatomical  
819 evolution. *Proc. Natl. Acad. Sci. U. S. A.* **71**, 3028–3030 (1974).
- 820 27. Morescalchi, A. Evolution and karyology of the amphibians. *Boll. Zool.* **47**, 113–126 (1980).
- 821 28. Bush, G. L., Case, S. M., Wilson, A. C. & Patton, J. L. Rapid speciation and chromosomal  
822 evolution in mammals. *Proc. Natl. Acad. Sci. U. S. A.* **74**, 3942–3946 (1977).
- 823 29. Nowoshilow, S. *et al.* The axolotl genome and the evolution of key tissue formation  
824 regulators. *Nature* **554**, 50–55 (2018).

- 825 30. Smith, J. J. *et al.* A chromosome-scale assembly of the axolotl genome. *Genome Res.* **29**,  
826 317–324 (2019).
- 827 31. Deakin, J. E., Graves, J. A. M. & Rens, W. The evolution of marsupial and monotreme  
828 chromosomes. *Cytogenet. Genome Res.* **137**, 113–129 (2012).
- 829 32. Bogart, J. P., Balon, E. K. & Bruton, M. N. The chromosomes of the living coelacanth and  
830 their remarkable similarity to those of one of the most ancient frogs. *J. Hered.* **85**, 322–325  
831 (1994).
- 832 33. Hellsten, U. *et al.* The genome of the Western clawed frog *Xenopus tropicalis*. *Science*  
833 **328**, 633–636 (2010).
- 834 34. Carneiro, M. O. *et al.* Pacific biosciences sequencing technology for genotyping and  
835 variation discovery in human data. *BMC Genomics* **13**, 375 (2012).
- 836 35. Koren, S. *et al.* Hybrid error correction and *de novo* assembly of single-molecule  
837 sequencing reads. *Nat. Biotechnol.* **30**, 693–700 (2012).
- 838 36. Quail, M. A. *et al.* A tale of three next generation sequencing platforms: comparison of Ion  
839 Torrent, Pacific Biosciences and Illumina MiSeq sequencers. *BMC Genomics* **13**, 341  
840 (2012).
- 841 37. Loomis, E. W. *et al.* Sequencing the unsequenceable: Expanded CGG-repeat alleles of the  
842 fragile X gene. *Genome Research* vol. 23 121–128 (2013).
- 843 38. Feng, Y.-J. *et al.* Phylogenomics reveals rapid, simultaneous diversification of three major  
844 clades of Gondwanan frogs at the Cretaceous-Paleogene boundary. *Proc. Natl. Acad. Sci.*  
845 *U. S. A.* **114**, E5864–E5870 (2017).
- 846 39. Schmid, M. *et al.* The chromosomes of Terraranan frogs. Insights into vertebrate  
847 cytogenetics. *Cytogenetic and Genome Research* vols 130-131 1–14 (2010).
- 848 40. Rabello, M. N. Chromosomal studies in Brazilian anurans. *Caryologia* **23**, 45–59 (1970).
- 849 41. Scheel, J. J. The chromosomes of some African anuran species. in *Genetics and*  
850 *Mutagenesis of Fish* 113–116 (Springer Berlin Heidelberg, 1973). doi:10.1007/978-3-642-



- 851 65700-9\_11.
- 852 42. Mezzasalma, M., Glaw, F., Odierna, G., Petraccioli, A. & Guarino, F. M. Karyological  
853 analyses of *Pseudhymenochirus merlini* and *Hymenochirus boettgeri* provide new insights  
854 into the chromosome evolution in the anuran family Pipidae. *Zoologischer Anzeiger - A  
855 Journal of Comparative Zoology* **258**, 47–53 (2015).
- 856 43. Temple, G. *et al.* The completion of the mammalian gene collection (MGC). *Genome Res.*  
857 **19**, 2324–2333 (2009).
- 858 44. Marin, R. *et al.* Convergent origination of a *Drosophila*-like dosage compensation  
859 mechanism in a reptile lineage. *Genome Research* vol. 27 1974–1987 (2017).
- 860 45. Owens, N. D. L. *et al.* Measuring absolute RNA copy numbers at high temporal resolution  
861 reveals transcriptome kinetics in development. *Cell Reports* vol. 14 632–647 (2016).
- 862 46. Warren, W. C. *et al.* A new chicken genome assembly provides insight into avian genome  
863 structure. *G3: Genes|Genomes|Genetics* vol. 7 109–117 (2017).
- 864 47. Howe, K. *et al.* The zebrafish reference genome sequence and its relationship to the  
865 human genome. *Nature* **496**, 498–503 (2013).
- 866 48. Mouse Genome Sequencing Consortium *et al.* Initial sequencing and comparative analysis  
867 of the mouse genome. *Nature* **420**, 520–562 (2002).
- 868 49. Lander, E. S. *et al.* Initial sequencing and analysis of the human genome. *Nature* **409**,  
869 860–921 (2001).
- 870 50. Venter, J. C. *et al.* The sequence of the human genome. *Science* **291**, 1304–1351 (2001).
- 871 51. Lovell, P. V. *et al.* Conserved syntenic clusters of protein coding genes are missing in  
872 birds. *Genome Biol.* **15**, 565 (2014).
- 873 52. Xu, L. *et al.* OrthoVenn2: A web server for whole-genome comparison and annotation of  
874 orthologous clusters across multiple species. *Nucleic Acids Research* vol. 47 W52–W58  
875 (2019).
- 876 53. Hartley, G. & O'Neill, R. Centromere repeats: Hidden gems of the genome. *Genes* vol. 10



- 877 223 (2019).
- 878 54. Chueh, A. C., Wong, L. H., Wong, N. & Choo, K. H. A. Variable and hierarchical size  
879 distribution of L1-retroelement-enriched CENP-A clusters within a functional human  
880 neocentromere. *Hum. Mol. Genet.* **14**, 85–93 (2005).
- 881 55. Kuznetsova, I. S. *et al.* LINE-related component of mouse heterochromatin and complex  
882 chromocenters' composition. *Chromosome Res.* **24**, 309–323 (2016).
- 883 56. Suh, A. The specific requirements for CR1 retrotransposition explain the scarcity of  
884 retrogenes in birds. *J. Mol. Evol.* **81**, 18–20 (2015).
- 885 57. Benson, G. Tandem Repeats Finder: A program to analyze DNA sequences. *Nucleic Acids*  
886 *Research* vol. 27 573–580 (1999).
- 887 58. Igawa, T. *et al.* Inbreeding ratio and genetic relationships among strains of the Western  
888 clawed frog, *Xenopus tropicalis*. *PLoS One* **10**, e0133963 (2015).
- 889 59. Ford, L. S. & Cannatella, D. C. The major clades of frogs. *Herpetological Monographs.* **7**,  
890 94–117 (1993).
- 891 60. Bhutkar, A. *et al.* Chromosomal rearrangement inferred from comparisons of 12 *Drosophila*  
892 genomes. *Genetics* **179**, 1657–1680 (2008).
- 893 61. Pyron, R. A. Divergence time estimation using fossils as terminal taxa and the origins of  
894 Lissamphibia. *Syst. Biol.* **60**, 466–481 (2011).
- 895 62. Schubert, I. & Lysak, M. A. Interpretation of karyotype evolution should consider  
896 chromosome structural constraints. *Trends Genet.* **27**, 207–216 (2011).
- 897 63. Griffin, D. K., Robertson, L. B. W., Tempest, H. G. & Skinner, B. M. The evolution of the  
898 avian genome as revealed by comparative molecular cytogenetics. *Cytogenet. Genome*  
899 *Res.* **117**, 64–77 (2007).
- 900 64. Deakin, J. E. & Ezaz, T. Understanding the evolution of reptile chromosomes through  
901 applications of combined cytogenetics and genomics approaches. *Cytogenet. Genome*  
902 *Res.* **157**, 7–20 (2019).

- 903 65. Maruyama, T. & Imai, H. T. Evolutionary rate of the mammalian karyotype. *J. Theor. Biol.*  
904 **90**, 111–121 (1981).
- 905 66. Olmo, E. Rate of chromosome changes and speciation in reptiles. *Genetica* **125**, 185–203  
906 (2005).
- 907 67. Jagannathan, M., Cummings, R. & Yamashita, Y. M. A conserved function for  
908 pericentromeric satellite DNA. *Elife* **7**, (2018).
- 909 68. Edwards, N. S. & Murray, A. W. Identification of *Xenopus* CENP-A and an associated  
910 centromeric DNA repeat. *Molecular Biology of the Cell* vol. 16 1800–1810 (2005).
- 911 69. Smith, O. K. *et al.* Identification and characterization of centromeric sequences in *Xenopus*  
912 *laevis*. *Cold Spring Harbor Laboratory* 2020.06.23.167643 (2020)  
913 doi:10.1101/2020.06.23.167643.
- 914 70. Penke, T. J. R., McKay, D. J., Strahl, B. D., Matera, A. G. & Duronio, R. J. Direct  
915 interrogation of the role of H3K9 in metazoan heterochromatin function. *Genes Dev.* **30**,  
916 1866–1880 (2016).
- 917 71. Di Giacomo, M. *et al.* Multiple epigenetic mechanisms and the piRNA pathway enforce  
918 LINE1 silencing during adult spermatogenesis. *Mol. Cell* **50**, 601–608 (2013).
- 919 72. Kong, A. *et al.* A high-resolution recombination map of the human genome. *Nat. Genet.* **31**,  
920 241–247 (2002).
- 921 73. Backstrom, N. *et al.* The recombination landscape of the zebra finch *Taeniopygia guttata*  
922 genome. *Genome Research* vol. 20 485–495 (2010).
- 923 74. Dréau, A., Venu, V., Avdievich, E., Gaspar, L. & Jones, F. C. Genome-wide recombination  
924 map construction from single individuals using linked-read sequencing. *Nat. Commun.* **10**,  
925 4309 (2019).
- 926 75. Shanfelter, A. F., Archambeault, S. L. & White, M. A. Divergent fine-scale recombination  
927 landscapes between a freshwater and marine population of threespine stickleback fish.  
928 *Genome Biol. Evol.* **11**, 1573–1585 (2019).

- 929 76. Singhal, S. *et al.* Stable recombination hotspots in birds. *Science* **350**, 928–932 (2015).
- 930 77. Jensen-Seaman, M. I. *et al.* Comparative recombination rates in the rat, mouse, and  
931 human genomes. *Genome Res.* **14**, 528–538 (2004).
- 932 78. Baker, Z. *et al.* Repeated losses of PRDM9-directed recombination despite the  
933 conservation of PRDM9 across vertebrates. *Elife* **6**, (2017).
- 934 79. Kuhl, L.-M. & Vader, G. Kinetochores, cohesin, and DNA breaks: Controlling meiotic  
935 recombination within pericentromeres. *Yeast* **36**, 121–127 (2019).
- 936 80. Termolino, P., Cremona, G., Consiglio, M. F. & Conicella, C. Insights into epigenetic  
937 landscape of recombination-free regions. *Chromosoma* vol. 125 301–308 (2016).
- 938 81. Groenen, M. A. M. *et al.* A high-density SNP-based linkage map of the chicken genome  
939 reveals sequence features correlated with recombination rate. *Genome Res.* **19**, 510–519  
940 (2009).
- 941 82. Duret, L. & Galtier, N. Biased gene conversion and the evolution of mammalian genomic  
942 landscapes. *Annu. Rev. Genomics Hum. Genet.* **10**, 285–311 (2009).
- 943 83. Galtier, N., Piganeau, G., Mouchiroud, D. & Duret, L. GC-content evolution in mammalian  
944 genomes: the biased gene conversion hypothesis. *Genetics* **159**, 907–911 (2001).
- 945 84. Meunier, J. & Duret, L. Recombination drives the evolution of GC-content in the human  
946 genome. *Mol. Biol. Evol.* **21**, 984–990 (2004).
- 947 85. Lam, B. S. & Carroll, D. Tandemly repeated DNA sequences from *Xenopus laevis*. I.  
948 Studies on sequence organization and variation in satellite 1 DNA (741 base-pair repeat).  
949 *J. Mol. Biol.* **165**, 567–585 (1983).
- 950 86. Cohen, S., Menut, S. & Méchali, M. Regulated formation of extrachromosomal circular  
951 DNA molecules during development in *Xenopus laevis*. *Mol. Cell. Biol.* **19**, 6682–6689  
952 (1999).
- 953 87. Ogiwara, I. V-SINES: A new superfamily of vertebrate SINES that are widespread in  
954 vertebrate genomes and retain a strongly conserved segment within each repetitive unit.

- 955            *Genome Research* vol. 12 316–324 (2002).
- 956    88. Rao, S. S. P. *et al.* A 3D map of the human genome at kilobase resolution reveals  
957            principles of chromatin looping. *Cell* **159**, 1665–1680 (2014).
- 958    89. Rabl, C. Über Zelltheilung. *Morphologisches Jahrbuch* 214–330 (1885).
- 959    90. Muller, H., Gil, J., Jr & Drinnenberg, I. A. The impact of centromeres on spatial genome  
960            architecture. *Trends Genet.* **35**, 565–578 (2019).
- 961    91. Therizols, P., Duong, T., Dujon, B., Zimmer, C. & Fabre, E. Chromosome arm length and  
962            nuclear constraints determine the dynamic relationship of yeast subtelomeres. *Proc. Natl.*  
963            *Acad. Sci. U. S. A.* **107**, 2025–2030 (2010).
- 964    92. Buttrick, G. J. *et al.* Nsk1 ensures accurate chromosome segregation by promoting  
965            association of kinetochores to spindle poles during anaphase B. *Mol. Biol. Cell* **22**, 4486–  
966            4502 (2011).
- 967    93. Stevens, T. J. *et al.* 3D structures of individual mammalian genomes studied by single-cell  
968            Hi-C. *Nature* **544**, 59–64 (2017).
- 969    94. Dudchenko, O. *et al.* *De novo* assembly of the *Aedes aegypti* genome using Hi-C yields  
970            chromosome-length scaffolds. *Science* **356**, 92–95 (2017).
- 971    95. Duan, Z. *et al.* A three-dimensional model of the yeast genome. *Nature* vol. 465 363–367  
972            (2010).
- 973    96. Armstrong, S. J., Franklin, F. C. & Jones, G. H. Nucleolus-associated telomere clustering  
974            and pairing precede meiotic chromosome synapsis in *Arabidopsis thaliana*. *J. Cell Sci.*  
975            **114**, 4207–4217 (2001).
- 976    97. Mascher, M. *et al.* A chromosome conformation capture ordered sequence of the barley  
977            genome. *Nature* **544**, 427–433 (2017).
- 978    98. Cowan, C. R., Carlton, P. M. & Cande, W. Z. The polar arrangement of telomeres in  
979            interphase and meiosis. Rabl organization and the bouquet. *Plant Physiol.* **125**, 532–538  
980            (2001).

- 981 99. Varoquaux, N. *et al.* Accurate identification of centromere locations in yeast genomes  
982 using Hi-C. *Nucleic Acids Res.* **43**, 5331–5339 (2015).
- 983 100. Rowley, M. J. & Corces, V. G. Organizational principles of 3D genome architecture. *Nat.*  
984 *Rev. Genet.* **19**, 789–800 (2018).
- 985 101. Lu, J. Y. *et al.* Homotypic clustering of L1 and B1/Alu repeats compartmentalizes the 3D  
986 genome. *Cell Res.* (2021) doi:10.1038/s41422-020-00466-6.
- 987 102. Fishman, V. *et al.* 3D organization of chicken genome demonstrates evolutionary  
988 conservation of topologically associated domains and highlights unique architecture of  
989 erythrocytes' chromatin. *Nucleic Acids Research* vol. 47 648–665 (2019).
- 990 103. Kaaij, L. J. T., van der Weide, R. H., Ketting, R. F. & de Wit, E. Systemic loss and gain of  
991 chromatin architecture throughout zebrafish development. *Cell Rep.* **24**, 1–10.e4 (2018).
- 992 104. Eagen, K. P., Aiden, E. L. & Kornberg, R. D. Polycomb-mediated chromatin loops revealed  
993 by a subkilobase-resolution chromatin interaction map. *Proc. Natl. Acad. Sci. U. S. A.* **114**,  
994 8764–8769 (2017).
- 995 105. Dong, P. *et al.* 3D chromatin architecture of large plant genomes determined by local A/B  
996 compartments. *Mol. Plant* **10**, 1497–1509 (2017).
- 997 106. Francke, U. 2012 William Allan Award: Adventures in cytogenetics. *Am. J. Hum. Genet.* **92**,  
998 325–337 (2013).
- 999 107. Uno, Y. *et al.* Diversity in the origins of sex chromosomes in anurans inferred from  
1000 comparative mapping of sexual differentiation genes for three species of the Raninae and  
1001 Xenopodinae. *Chromosome Res.* **16**, 999–1011 (2008).
- 1002 108. Uno, Y. *et al.* Inference of the protokaryotypes of amniotes and tetrapods and the  
1003 evolutionary processes of microchromosomes from comparative gene mapping. *PLoS One*  
1004 **7**, e53027 (2012).
- 1005 109. Parada, L. A., McQueen, P. G., Munson, P. J. & Misteli, T. Conservation of relative  
1006 chromosome positioning in normal and cancer cells. *Curr. Biol.* **12**, 1692–1697 (2002).

- 1007 110. Parada, L. A., McQueen, P. G. & Misteli, T. Tissue-specific spatial organization of  
1008 genomes. *Genome Biol.* **5**, R44 (2004).
- 1009 111. Lieberman-Aiden, E. *et al.* Comprehensive mapping of long-range interactions reveals  
1010 folding principles of the human genome. *Science* **326**, 289–293 (2009).
- 1011 112. Uno, Y., Nishida, C., Takagi, C., Ueno, N. & Matsuda, Y. Homoeologous chromosomes of  
1012 *Xenopus laevis* are highly conserved after whole-genome duplication. *Heredity* vol. 111  
1013 430–436 (2013).
- 1014 113. Rosin, L. F. *et al.* Chromosome territory formation attenuates the translocation potential of  
1015 cells. *Elife* **8**, (2019).
- 1016 114. Bright, A. R. *et al.* Combinatorial transcription factor activities on open chromatin induce  
1017 embryonic heterogeneity in vertebrates. *EMBO J.* **40**, e104913 (2021).
- 1018 115. Kakebeen, A. D., Chitsazan, A. D., Williams, M. C., Saunders, L. M. & Wills, A. E.  
1019 Chromatin accessibility dynamics and single cell RNA-Seq reveal new regulators of  
1020 regeneration in neural progenitors. *Elife* **9**, (2020).
- 1021 116. Elinson, R. P. Metamorphosis in a frog that does not have a tadpole. *Curr. Top. Dev. Biol.*  
1022 **103**, 259–276 (2013).
- 1023 117. del Pino, E. M. *et al.* A comparative analysis of frog early development. *Proc. Natl. Acad.*  
1024 *Sci. U. S. A.* **104**, 11882–11888 (2007).
- 1025 118. Vargas, A. & Del Pino, E. M. Analysis of cell size in the gastrula of ten frog species reveals  
1026 a correlation of egg with cell sizes, and a conserved pattern of small cells in the marginal  
1027 zone. *J. Exp. Zool. B Mol. Dev. Evol.* **328**, 88–96 (2017).
- 1028 119. Oswald, P. *et al.* Locality, time and heterozygosity affect chytrid infection in yellow-bellied  
1029 toads. *Dis. Aquat. Organ.* **142**, 225–237 (2020).
- 1030 120. Alford, R. A., Dixon, P. M. & Pechmann, J. H. Ecology. Global amphibian population  
1031 declines. *Nature* vol. 412 499–500 (2001).
- 1032 121. Leung, B. *et al.* Clustered versus catastrophic global vertebrate declines. *Nature* **588**, 267–

- 1033 271 (2020).
- 1034 122. Weisenfeld, N. I., Kumar, V., Shah, P., Church, D. M. & Jaffe, D. B. Direct determination of  
1035 diploid genome sequences. *Genome Res.* **27**, 757–767 (2017).
- 1036 123. Ye, C., Hill, C. M., Wu, S., Ruan, J. & Ma, Z. S. DBG2OLC: Efficient assembly of large  
1037 genomes using long erroneous reads of the third generation sequencing technologies. *Sci.*  
1038 *Rep.* **6**, 31900 (2016).
- 1039 124. Koren, S. *et al.* Canu: Scalable and accurate long-read assembly via adaptive k-mer  
1040 weighting and repeat separation. *Genome Res.* **27**, 722–736 (2017).
- 1041 125. Kurtz, S. *et al.* Versatile and open software for comparing large genomes. *Genome Biol.* **5**,  
1042 R12 (2004).
- 1043 126. Chakraborty, M., Baldwin-Brown, J. G., Long, A. D. & Emerson, J. J. Contiguous and  
1044 accurate *de novo* assembly of metazoan genomes with modest long read coverage.  
1045 *Nucleic Acids Research* gkw654 (2016) doi:10.1093/nar/gkw654.
- 1046 127. Boetzer, M., Henkel, C. V., Jansen, H. J., Butler, D. & Pirovano, W. Scaffolding pre-  
1047 assembled contigs using SSPACE. *Bioinformatics* **27**, 578–579 (2011).
- 1048 128. Durand, N. C. *et al.* Juicer provides a one-click system for analyzing loop-resolution Hi-C  
1049 experiments. *Cell Syst* **3**, 95–98 (2016).
- 1050 129. Durand, N. C. *et al.* Juicebox provides a visualization system for Hi-C contact maps with  
1051 unlimited zoom. *Cell Systems* vol. 3 99–101 (2016).
- 1052 130. Dudchenko, O., Shamim, M. S., Batra, S. S. & Durand, N. C. The Juicebox Assembly  
1053 Tools module facilitates *de novo* assembly of mammalian genomes with chromosome-  
1054 length scaffolds for under \$1000. *Biorxiv* (2018).
- 1055 131. Chin, C.-S. *et al.* Nonhybrid, finished microbial genome assemblies from long-read SMRT  
1056 sequencing data. *Nat. Methods* **10**, 563–569 (2013).
- 1057 132. Walker, B. J. *et al.* Pilon: An integrated tool for comprehensive microbial variant detection  
1058 and genome assembly improvement. *PLoS ONE* vol. 9 e112963 (2014).



- 1059 133. Garrison, E. & Marth, G. Haplotype-based variant detection from short-read sequencing.  
1060 *arXiv [q-bio.GN]* (2012).
- 1061 134. Shu, S., Rokhsar, D., Goodstein, D., Hayes, D. & Mitros, T. *JGI Plant Genomics Gene*  
1062 *Annotation Pipeline*. <https://www.osti.gov/biblio/1241222> (2014).
- 1063 135. Grabherr, M. G. *et al.* Full-length transcriptome assembly from RNA-Seq data without a  
1064 reference genome. *Nat. Biotechnol.* **29**, 644–652 (2011).
- 1065 136. Haas, B. J. *et al.* *De novo* transcript sequence reconstruction from RNA-seq using the  
1066 Trinity platform for reference generation and analysis. *Nat. Protoc.* **8**, 1494–1512 (2013).
- 1067 137. Smit, A. F. A. & Hubley, R. *RepeatModeler Open-1.0*. (2008-2015).
- 1068 138. Jurka, J. *et al.* Repbase Update, a database of eukaryotic repetitive elements. *Cytogenet.*  
1069 *Genome Res.* **110**, 462–467 (2005).
- 1070 139. Smit, A. F. A., Hubley, R. & Green, P. *RepeatMasker Open-4.0*. (2013-2015).
- 1071 140. Chapman, J. A. *et al.* Meraculous: *De novo* genome assembly with short paired-end reads.  
1072 *PLoS One* **6**, e23501 (2011).
- 1073 141. Goltsman, E., Ho, I. & Rokhsar, D. Meraculous-2D: Haplotype-sensitive assembly of highly  
1074 heterozygous genomes. *arXiv [q-bio.GN]* (2017).
- 1075 142. Putnam, N. H. *et al.* Chromosome-scale shotgun assembly using an in vitro method for  
1076 long-range linkage. *Genome Res.* **26**, 342–350 (2016).
- 1077 143. English, A. C. *et al.* Mind the gap: upgrading genomes with Pacific Biosciences RS long-  
1078 read sequencing technology. *PLoS One* **7**, e47768 (2012).
- 1079 144. Kajitani, R. *et al.* Efficient *de novo* assembly of highly heterozygous genomes from whole-  
1080 genome shotgun short reads. *Genome Res.* **24**, 1384–1395 (2014).
- 1081 145. Mudd, A. B., Bredeson, J. V., Baum, R., Hockemeyer, D. & Rokhsar, D. S. Analysis of  
1082 muntjac deer genome and chromatin architecture reveals rapid karyotype evolution.  
1083 *Communications Biology* vol. 3 (2020).
- 1084 146. Paten, B. *et al.* Cactus: Algorithms for genome multiple sequence alignment. *Genome Res.*

- 1085           **21**, 1512–1528 (2011).
- 1086    147. Blanchette, M. *et al.* Aligning multiple genomic sequences with the threaded blockset  
1087           aligner. *Genome Res.* **14**, 708–715 (2004).
- 1088    148. Kumar, S., Stecher, G., Suleski, M. & Hedges, S. B. TimeTree: A resource for timelines,  
1089           timetrees, and divergence times. *Mol. Biol. Evol.* **34**, 1812–1819 (2017).
- 1090    149. Kielbasa, S. M., Wan, R., Sato, K., Horton, P. & Frith, M. C. Adaptive seeds tame genomic  
1091           sequence comparison. *Genome Res.* **21**, 487–493 (2011).
- 1092    150. Stamatakis, A. RAxML version 8: a tool for phylogenetic analysis and post-analysis of large  
1093           phylogenies. *Bioinformatics* **30**, 1312–1313 (2014).
- 1094    151. Kumar, S., Stecher, G. & Tamura, K. MEGA7: Molecular Evolutionary Genetics Analysis  
1095           version 7.0 for bigger datasets. *Mol. Biol. Evol.* **33**, 1870–1874 (2016).
- 1096    152. Tamura, K. *et al.* Estimating divergence times in large molecular phylogenies. *Proc. Natl.*  
1097           *Acad. Sci. U. S. A.* **109**, 19333–19338 (2012).
- 1098    153. Krzywinski, M. *et al.* Circos: an information aesthetic for comparative genomics. *Genome*  
1099           *Res.* **19**, 1639–1645 (2009).
- 1100    154. Dondoshansky, I. & Wolf, Y. Blastclust (NCBI Software Development Toolkit).  
1101           *ScienceOpen* [https://www.scienceopen.com/document?vid=b654ab9a-231d-410a-832d-](https://www.scienceopen.com/document?vid=b654ab9a-231d-410a-832d-37c7c7bc7165)  
1102           37c7c7bc7165 (2002).
- 1103    155. Camacho, C. *et al.* BLAST+: Architecture and applications. *BMC Bioinformatics* **10**, 421  
1104           (2009).
- 1105    156. Li, H. Aligning sequence reads, clone sequences and assembly contigs with BWA-MEM.  
1106           *arXiv [q-bio.GN]* (2013).
- 1107    157. Li, H. *et al.* The Sequence Alignment/Map format and SAMtools. *Bioinformatics* **25**, 2078–  
1108           2079 (2009).
- 1109    158. Quinlan, A. R. BEDTools: The Swiss-army tool for genome feature analysis. *Curr. Protoc.*  
1110           *Bioinformatics* **47**, 11.12.1–34 (2014).

- 1111 159. Bredeson, J. V. *et al.* Sequencing wild and cultivated cassava and related species reveals  
1112 extensive interspecific hybridization and genetic diversity. *Nat. Biotechnol.* **34**, 562–570  
1113 (2016).
- 1114 160. Bolger, A. M., Lohse, M. & Usadel, B. Trimmomatic: a flexible trimmer for Illumina  
1115 sequence data. *Bioinformatics* vol. 30 2114–2120 (2014).
- 1116 161. Li, H. Minimap2: Pairwise alignment for nucleotide sequences. *Bioinformatics* **34**, 3094–  
1117 3100 (2018).
- 1118 162. Ramírez, F. *et al.* deepTools2: a next generation web server for deep-sequencing data  
1119 analysis. *Nucleic Acids Res.* **44**, W160–5 (2016).
- 1120 163. Van Ooijen, J. W. Multipoint maximum likelihood mapping in a full-sib family of an  
1121 outbreeding species. *Genet. Res.* **93**, 343–349 (2011).
- 1122 164. Myers, S., Bottolo, L., Freeman, C., McVean, G. & Donnelly, P. A fine-scale map of  
1123 recombination rates and hotspots across the human genome. *Science* **310**, 321–324  
1124 (2005).
- 1125 165. Shifman, S. *et al.* A high-resolution single nucleotide polymorphism genetic map of the  
1126 mouse genome. *PLoS Biol.* **4**, e395 (2006).
- 1127 166. Knight, P. A. & Ruiz, D. A fast algorithm for matrix balancing. *IMA J. Numer. Anal.* **33**,  
1128 1029–1047 (2012).
- 1129 167. R Core Team. R Core Team. R: A language and environment for statistical computing.  
1130 *Foundation for Statistical Computing* (2013).
- 1131 168. Tang, H. *et al.* Synteny and collinearity in plant genomes. *Science* **320**, 486–488 (2008).

## 1132 Acknowledgements

1133 We thank Karen Lundy and the Functional Genomics Laboratory at the University of California  
1134 Berkeley for running quality control on extracted DNA and RNA and for preparing Illumina short-  
1135 insert libraries; Oanh Nguyen and the DNA Technologies and Expression Analysis Cores at the  
1136 University of California Davis Genome Center for preparing and sequencing PacBio libraries;  
1137 Dovetail Genomics for providing the HiC library preparation kit, running quality control on HiC  
1138 libraries, and preparing and sequencing HiC libraries; Shana McDevitt and the Vincent J.  
1139 Coates Genomics Sequencing Laboratory at the University of California Berkeley for  
1140 sequencing HiC and Illumina short-insert libraries; Shengqiang Shu for advice on the use of the  
1141 IGC annotation pipeline. We thank Rick Elinson for providing *E. coqui* frogs and tissues. We  
1142 thank Gary Gorbsky from the Oklahoma Medical Research Foundation and Marko Horb and the  
1143 National *Xenopus* Resource at the MBL for providing the XTN-6 cell lines. Finally, we thank  
1144 Chunhui Hou and colleagues for permission to access their HiC data prior to publication.

1145

## 1146 Funding

1147 This study was supported by NIH grants R01HD080708 to D.S.R.; R01GM086321,  
1148 R01HD065705 to D.S.R. and R.M.H.; R35GM127069 to R.M.H.; R35 GM118183 to R.B.H.  
1149 A.B.M. was supported by NIH grants T32GM007127 and T32HG000047 and a David L. Boren  
1150 Fellowship. D.S.R. is grateful for support from the Marthella Foskett Brown Chair in Biological  
1151 Sciences; R.M.H., the C.H. Li Distinguished Chair in Molecular and Cell Biology; and R.H., the  
1152 Flora Lamson Hewlett chair in biochemistry. A.F.S. and O.K.S. were supported by  
1153 R01GM074728, O.K.S. by NIH T32 GM113854-02 and NSF GRFP; M.K.K. and M.L. by  
1154 R01HD102186; J.H. by NSF grants DEB-1701591 and DBI-1702263; M.L., a Women in Science  
1155 Fellowship; T.K. by the Basic Science Research Program, National Research Foundation of

1156 Korea (NRF), Ministry of Education (2018R1A6A1A03025810), Future-leading Project Research  
1157 Fund (1.200094.01) of UNIST and the Institute for Basic Science (IBS-R022-D1); J.B.W. and  
1158 H.S.P. by R01GM104853, R01HD085901; M.J.R. by NSF IOS-0910112; Smithsonian Tropical  
1159 Research Institute; Clark Hubbs Regents Professorship; L.M.S. by the “Centre National de la  
1160 Recherche Scientifique” (PEPS ExoMod “Triton”) and the “Muséum National d’Histoire  
1161 Naturelle” (Action Transversale du Muséum “Cycles biologiques: Evolution et adaptation”) and a  
1162 Scientific council post-doctoral position to G.K.

1163

1164 This work used the Vincent J. Coates Genomics Sequencing Laboratory at the University of  
1165 California Berkeley, supported by NIH grant S10OD018174, and the DNA Technologies and  
1166 Expression Analysis Cores at the University of California Davis Genome Center, supported by  
1167 NIH grant S10OD010786. This research used the National Energy Research Scientific  
1168 Computing Center, a Department of Energy Office of Science User Facility supported by  
1169 contract number DE-AC02-05CH11231. LMS acknowledges the “Ecole Normale Supérieure de  
1170 PARIS” genomic platform for RNA-sequencing and the PCIA high performance computing  
1171 platform at “Muséum National d’Histoire Naturelle”.

1172

## 1173 Author Information

### 1174 Contributions

1175 J.V.B., A.B.M., S.M-R., T.M., R.M.H., and D.S.R. wrote the manuscript with feedback from M.L.,  
1176 H.P.S., J.H., J.B.L., J.B.W., M.J.R., O.K.S., D.R.B., M.G-P., J.H., N.B., T.K., L.M.S., R.H., J.S.,  
1177 M.K.K., A.F.S., and D.H. Genomes were assembled by J.V.B., S.S.B. (*Xtr*); A.B.M., and K.C.B.  
1178 (other frogs). S.M-R., A.B.M., and G.K. assembled transcripts and annotated genomes. S.M-R.  
1179 and J.V.B. assessed gene completeness; S.M-R. analyzed repeat and recombination  
1180 landscapes. S.M-R. and J.P. identified centromeric repeats. O.K.S., G.A-F. and A.F.S.

1181 conducted ChIP-seq experiments and S.M-R. performed analysis. J.V.B. analyzed HiC features.  
1182 T.M. constructed the linkage map. T.M. and J.V.B. analyzed heterozygosity. A.B.M. performed  
1183 genome-wide comparisons. K.E.M. and R.H. examined *Hbo* metaphase spreads. M.K.K. and  
1184 M.L. inbred *Xtr* frogs. R.M.H. (*Xtr*); M.G-P. (*Epu*); K.E.M. and R.H. (*Hbo*); M.L. and J.H. (*Eco*)  
1185 collected frogs. R.M.H. (*Xtr*); M.G-P., H.S-P. (*Epu*); and D.R.B. (*Eco*) collected tissue samples.  
1186 A.B.M., D.R.B. (*Eco*); J.B.L., and I.P. (*Xtr*) extracted DNA. A.B.M., S.M-R. (*Epu*); K.E.M., R.H.  
1187 (*Hbo*); and L.M.S. (*Eco*) extracted RNA and libraries were prepared by A.B.M. (*Epu*). M.L., J.H.  
1188 (*Eco*); K.E.M., and R.H. (*Hbo*) provided RNA-seq data. T.K., M.J.R., J.B.W. (*Epu*); and J.B.L.  
1189 (*Xtr*) coordinated sequencing. C.P., J.G., and J.S. prepared and sequenced 10x Genomics,  
1190 PacBio, and Illumina mate-pair libraries. D.H. prepared HiC libraries. R.D.D. and J.H.M.  
1191 provided early access to the *Pad* assembly. N.B. (*Eco*) provided bioinformatic support. L.M.S.  
1192 led the *Eco* efforts. R.M.H. and D.S.R. led the project.

1193

## 1194 [Ethics Declarations](#)

## 1195 [Competing Interests](#)

1196 D.S.R. is a member of the Scientific Advisory Board of, and a minor shareholder in, Dovetail  
1197 Genomics LLC, which provides as a service the high-throughput chromatin conformation  
1198 capture (HiC) technology used in this study.

1199

1200 M.K.K. is President and co-founder of Victory Genomics, Inc.

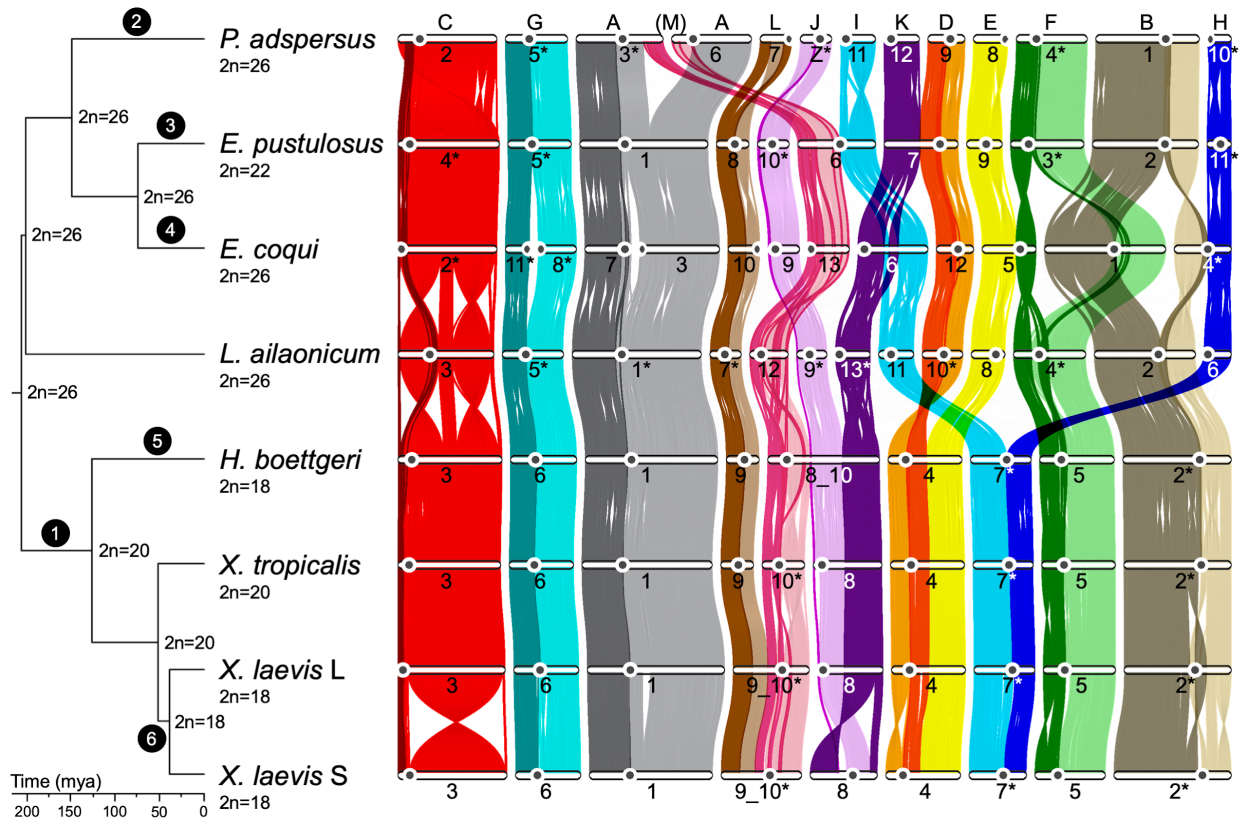

1201

1202 **Fig. 1 Phylogenetic tree and gene ortholog alignment.**

1203 The phylogenetic tree of the seven analyzed species, calculated from fourfold degenerate sites and  
 1204 divergence time confidence intervals, was visualized with FigTree (commit 901211e;  
 1205 <https://github.com/rambaut/figtree>). The ancestral karyotype at each node was labeled on the tree. The  
 1206 alignment plot was generated with `jcv.graphics.karyotype`<sup>168</sup> (v0.8.12; <https://github.com/tanghaibao/jcvi>)  
 1207 using the 7,292 described chromosome one-to-one gene orthologs from OrthoVenn2 (ref.<sup>52</sup>), followed by  
 1208 visual filtering of single stray orthologs. The pericentromeric region based on HiC inference was  
 1209 represented with a black circle on each chromosome. The ancestral chromosomes (A to M) were labeled  
 1210 at the top of the alignment based on the corresponding region in *P. adspersus*. The alignments for each  
 1211 ancestral chromosome were colored uniquely, with those upstream and downstream of the *X. tropicalis*  
 1212 centromeric satellite repeat from tandem repeat analysis shaded with a light versus dark shade of the  
 1213 ancestral chromosome color. Chromosomes labeled with an asterisk were reverse complemented in this  
 1214 image relative to the orientation in the assembly. Black circles with white text reference chromosome  
 1215 changes outlined in **Table 1**.



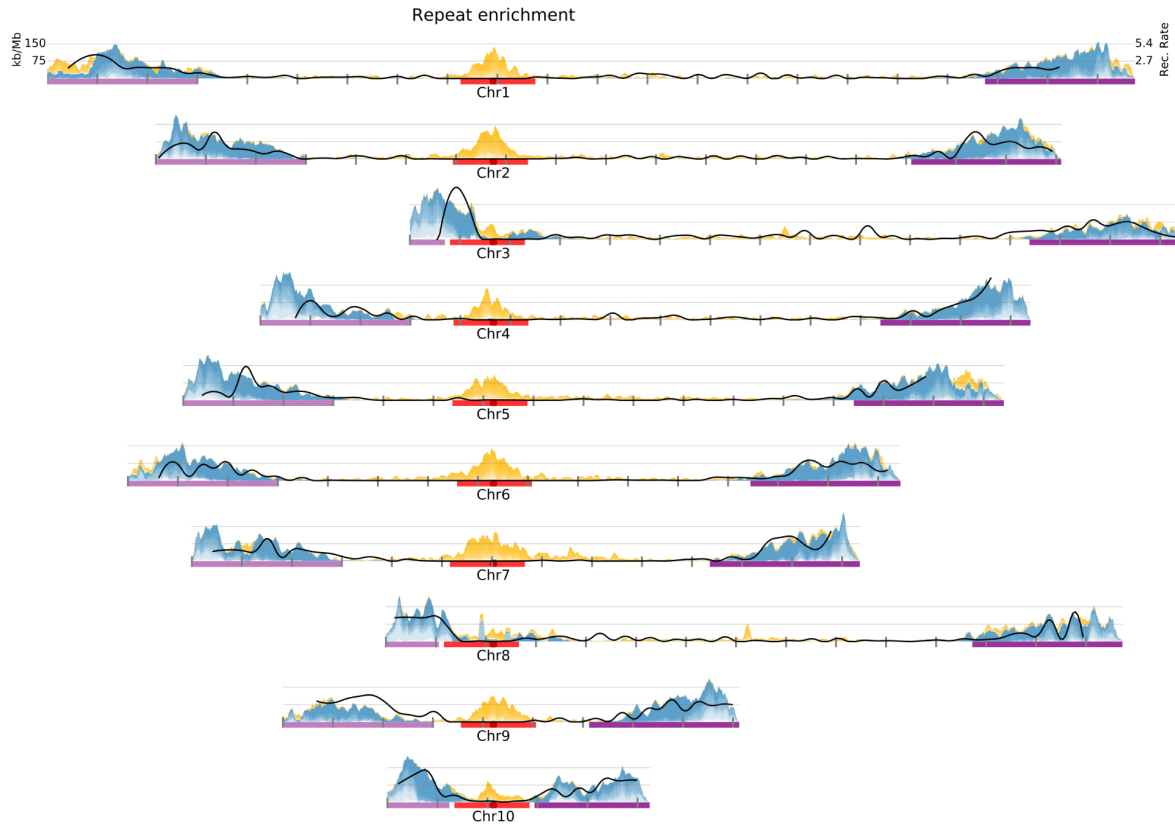

1216

1217 **Fig. 2 Density of pericentromeric and subtelomeric repeats in *Xenopus tropicalis*.**

1218 Pericentromeric boundaries (red) and subtelomeric boundaries (purple) were used to obtain enriched  
1219 repeats excluding chromosomes with short p-arms (chromosomes 3, 8, and 10). Pericentromeric repeats  
1220 (yellow) correspond to selected subsets of non-LTR retrotransposons (CR1, L1, and Penelope), LTR  
1221 retrotransposons (Ty3), and DNA transposons (PiggyBac and Harbinger). Subtelomeric enriched repeats  
1222 (blue) correspond mainly to Satellite repeats and LTR retrotransposons (Ty3, Ngaro). Chromosomes are  
1223 centered by the position of centromeric tandem repeats (black dot and dotted vertical line). The rate of  
1224 recombination (cM/Mb) is shown as a solid black line. Tick marks indicate 10 Mb blocks (**Supplementary**  
1225 **Fig. 16**).

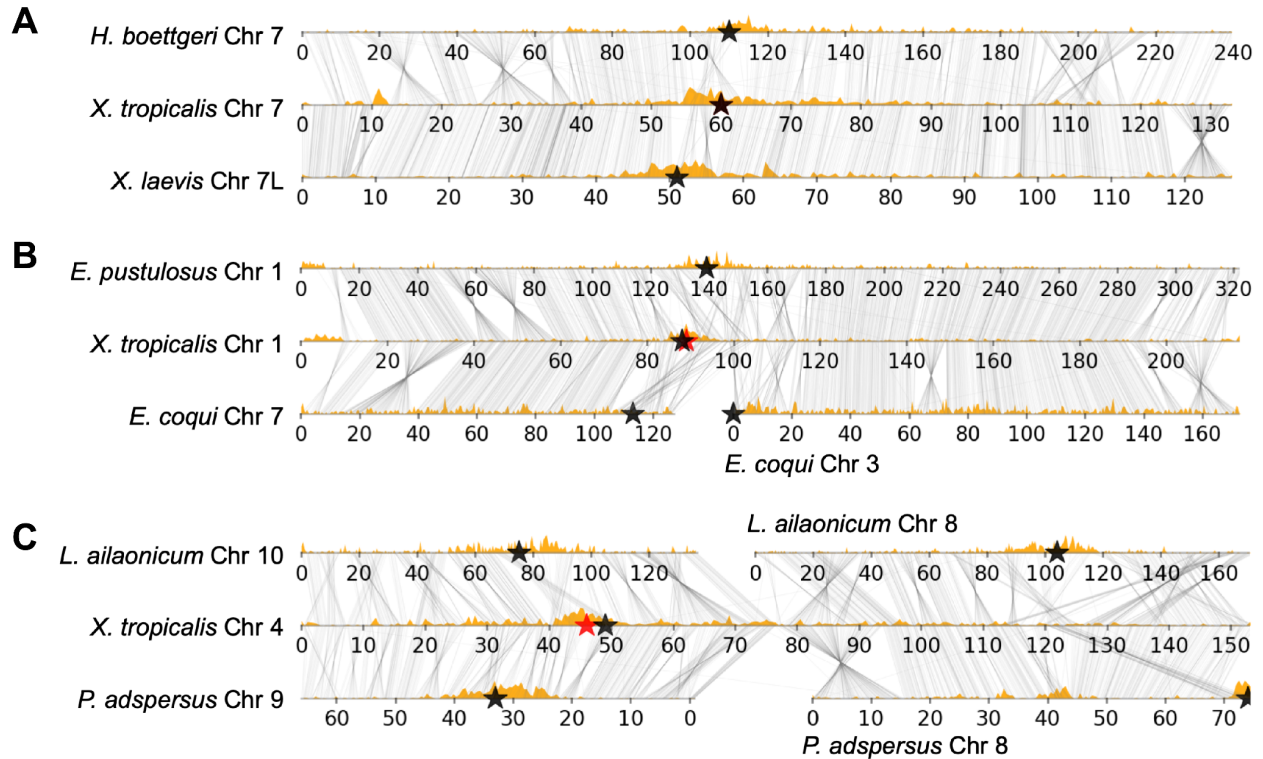

1226

1227 **Fig. 3 Subtelomeric repeats highlight regions of chromosome fusion.**

1228 Examples of (A) conserved chromosome structure and pericentromere maintenance, (B) a Robertsonian  
1229 translocation in the lineage leading to *E. coqui*, and (C) an end-to-end fusion that occurred in the lineage  
1230 giving rise to *X. tropicalis* and subsequent pericentromere loss. The analyzed species were visualized  
1231 with a custom script, alignment\_plots.py (v1.0; <https://github.com/abmudd/Assembly>). For each plot, the  
1232 HiC inference-based pericentromeric regions are depicted with black stars, the *X. tropicalis* centromeric  
1233 satellite repeat from tandem repeat analysis with a red star, the density of L1 repeats per chromosome  
1234 with light brown histograms, and the runs of collinearity containing at least one kb of aligned sequence  
1235 between the species with connecting black lines.

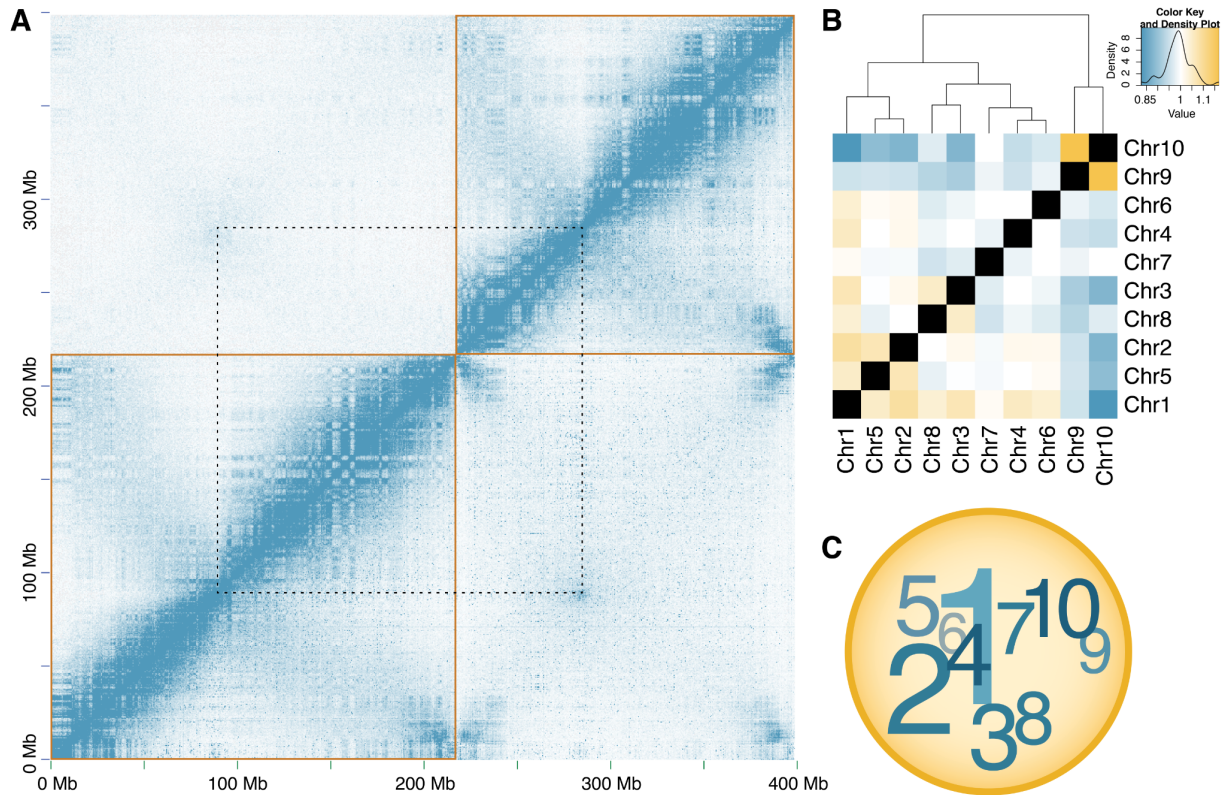

1236

1237 **Fig. 4 Organization of *X. tropicalis* chromosomes into Rab1 configuration and distinct**  
1238 **nuclear territories.**

1239 (A) HiC contact matrices at 500 kb resolution for chromosomes 1 and 2 (lower-left and upper-right gold  
1240 boxes, respectively) showing features of the three-dimensional chromatin architecture within *X. tropicalis*  
1241 blood cell nuclei. Blue pixels represent chromatin contacts between X-Y pairs of genomic loci, and their  
1242 intensity is proportional to their contact frequency. HiC read pairs are mapped stringently (MapQ  $\geq$  30)  
1243 above the diagonal and permissively (MapQ  $\geq$  0) below the diagonal. The characteristic A/B compartment  
1244 (“checkerboard”) and Rab1-like inter-arm (“angel wing”) contact patterns within each chromosome are  
1245 evident. Above the diagonal, an increased frequency of inter-chromosomal chromatin contacts is  
1246 observed between pericentromeres (connected by dotted lines) and between chromosome arms,  
1247 suggesting a centromere-clustered organization of chromosomes in Rab1 configuration. Below the  
1248 diagonal, high-intensity pixels not present above the diagonal are present near the ends of chromosomes,  
1249 suggesting a telomere-proximal spatial bias in the distributions of similar genomic repeats. See  
1250 **Supplementary Fig. 1D** for a plot showing all chromosomes. (B) Chromosome territories within the

1251 nucleus. Yellow, white, and blue colors indicate the normalized relative enrichment, parity, and depletion  
1252 of chromatin contacts between non-homologous chromosomes in the nucleus. For example,  
1253 Chromosome 1 exhibits higher relative contact frequencies with all chromosomes except chromosomes  
1254 Chr7, Chr9, and Chr10, which are generally depleted of contacts except among themselves. (MapQ  $\geq$  30;  
1255  $\chi^2(81, n = 24,987,749) = 3,049,787; p < 2.2 \times 10^{-308}$ ; Relative range: 0.82774–1.16834). (C) Schematic  
1256 representation of chromosome territories within the nucleus. Chromosome number size is proportional to  
1257 the number of enriched interactions. Darker and lighter colors indicate chromosomes nearer or distant to  
1258 the reader, respectively.

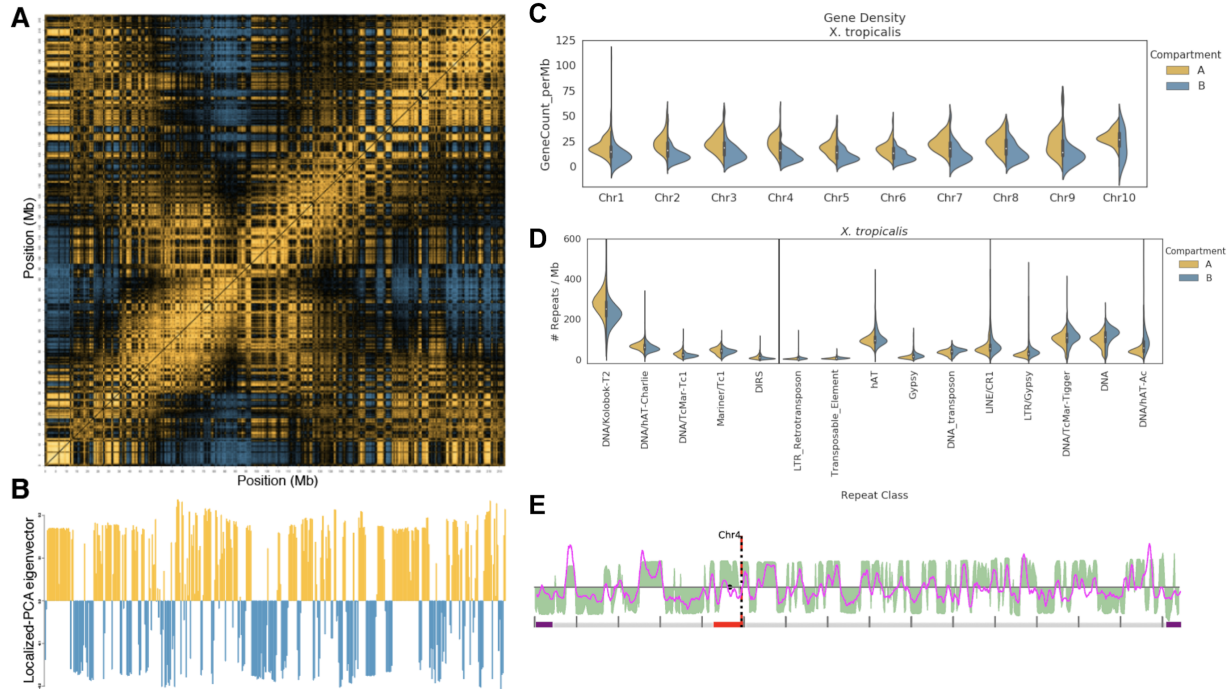

1259

1260 **Fig. 5 A/B compartment structure and gene/repeat densities.**

1261 (A) Correlation matrix of intra-chromosomal HiC contact densities between all pairs of non-overlapping  
1262 250 kb loci on chromosome 1. Yellow and blue pixels indicate correlation and anti-correlation,  
1263 respectively, and reveal which genomic loci occupy the same or different chromatin compartment. Black  
1264 pixels indicate weak/no correlation. (B) The first principal component eigenvectors revealing compartment  
1265 structure along chromosome 1, obtained by singular value decomposition of the correlation matrix in A.  
1266 Yellow (positive) and blue (negative) eigenvectors indicate regions of chromosome 1 partitioned into the  
1267 A and B compartments, respectively. (C) Gene density distributions in A vs. B compartments per  
1268 chromosome. (D) Repeat classes significantly enriched in A vs. B compartments. (E) The eigenvectors  
1269 obtained from the HiC correlation matrix (PC1, green) and the eigenvectors from the repeat density matrix  
1270 (PC3, pink) coincide at the transitions of predicted A/B compartments (**Supplementary Fig. 16B**).

**Table 1 Organization and conservation of the 13 ancestral chromosomes of pipanuran genomes**

|     | Phylogenetic position                                                          | Structural event                                                                                                                                                                                             |
|-----|--------------------------------------------------------------------------------|--------------------------------------------------------------------------------------------------------------------------------------------------------------------------------------------------------------|
| (1) | Stem pipid lineage                                                             | J + K $\Rightarrow$ JK<br>D. + E. $\Rightarrow$ D.E<br>I• + •H $\Rightarrow$ I•H (Rob. fusion)                                                                                                               |
| (2) | <i>P. adspersus</i> lineage after divergence from <i>R. temporaria</i>         | A + M $\Rightarrow$ A1.m1 + m2.A2                                                                                                                                                                            |
| (3) | <i>E. pustulosus</i> lineage after divergence from <i>E. coqui</i>             | M + I $\Rightarrow$ M.I (Rob)<br>K + D $\Rightarrow$ K.D (Possible end-end)                                                                                                                                  |
| (4) | <i>E. coqui</i> lineage after divergence from <i>E. pustulosus</i>             | G1•G2 $\Rightarrow$ G1• + •G2 (Rob. fission)<br>A1•A2 $\Rightarrow$ A1• + •A2 (Rob. fission)<br>I + K $\Rightarrow$ I•K (Rob. fusion + inversion)<br>E + F1•F2 + B1•B2 + H $\Rightarrow$ E•F1 + F2•B2 + B1•H |
| (5) | <i>H. boettgeri</i> lineage after divergence from <i>Xenopus</i>               | M + J•K $\Rightarrow$ MJK                                                                                                                                                                                    |
| (6) | <i>X. laevis</i> progenitor lineage after divergence from <i>X. tropicalis</i> | L + M $\Rightarrow$ LM                                                                                                                                                                                       |

Rob, Robertsonian. Middle-dots (i.e., “•”) represent centromeres. Periods (i.e., “.”) represent translocation breakpoints.



## 1271 **Supplementary Information**

- 1272 (Provided in a separate document)
- 1273 Supplementary Fig. 1 Genome assembly and recovery of missing genes.
- 1274 Supplementary Fig. 2 *Xenopus tropicalis* genome-wide HiC contact map.
- 1275 Supplementary Fig. 3 GC landscape and tandem repeats.
- 1276 Supplementary Fig. 4 Comparison of gene content in assemblies of model vertebrates.
- 1277 Supplementary Fig. 5 PCA eigenvectors projected on genomic coordinates.
- 1278 Supplementary Fig. 6 *Xenopus tropicalis* Nigerian strain residual heterozygosity.
- 1279 Supplementary Fig. 7 Assembly and annotation of other frog species.
- 1280 Supplementary Fig. 8 Pairwise gene colinearity of frog genomes.
- 1281 Supplementary Fig. 9 Chromosome fusions in *Xenopus laevis* and *Hymenochirus boettgeri*.
- 1282 Supplementary Fig. 10 Estimating the positions of *Xenopus tropicalis* centromeres.
- 1283 Supplementary Fig. 11 *Xenopus tropicalis* recombination landscape.
- 1284 Supplementary Fig. 12 Distribution of Satellite repeats in *Xenopus tropicalis*.
- 1285 Supplementary Fig. 13 Correlates of recombination rate.
- 1286 Supplementary Fig. 14 Zebra finch subtelomeric tandem repeats.
- 1287 Supplementary Fig. 15 Microsatellite origin SINE/tRNA evolved into a microsatellite sequence.
- 1288 Supplementary Fig. 16 *Xenopus tropicalis* 3D chromatin structure and nuclear organization.
- 1289 Supplementary Table 1 Sequence Completeness.
- 1290 Supplementary Table 2 Transcript coverage of *X. tropicalis* assemblies v9 and v10.
- 1291 Supplementary Table 3 *Xenopus tropicalis* protein coding loci annotation summary statistics.
- 1292 Supplementary Table 4 *Xenopus tropicalis* repeat abundances.
- 1293 Supplementary Table 5 Summary of other frog genome assemblies.
- 1294 Supplementary Table 6 Summary of annotations for other frog genomes.
- 1295 Supplementary Table 7 BUSCO genome scores of other frog genome assemblies.



- 1296 Supplementary Table 8 Ancestral chromosome fusions.
- 1297 Supplementary Table 9 N50 lengths for collinear runs of orthologous genes between frogs.
- 1298 Supplementary Table 10 Four-fold degeneracy nucleotide divergence.
- 1299 Supplementary Table 11 Estimation of divergence times.
- 1300 Supplementary Table 12 Centromeric Associated Tandem Repeat monomer lengths and  
1301 counts.
- 1302 Supplementary Table 13 Mapping statistics for ChIP-seq samples.
- 1303 Supplementary Table 14 Correlates of recombination rate.
- 1304 Supplementary Table 15 Subtelomeric enrichment for tandem repeats.
- 1305 Supplementary Table 16 Correspondence of monomer sequence with annotated repeat  
1306 elements.
- 1307 Supplementary Table 17 Copy counts of 52-mer minisatellite.
- 1308 Supplementary Table 18 Quantification of Rab1 structure strength and significance.
- 1309 Supplementary Table 19 Contact enrichment between chromosomes and chromosome arms.
- 1310 Supplementary Table 20 Relative enrichment of HiC contacts between chromosomes.
- 1311 Supplementary Note 1 High-throughput sequencing, *Xenopus tropicalis*.
- 1312 Supplementary Note 2 *Xenopus tropicalis* genome assembly and annotation.
- 1313 Supplementary Note 3 Additional chromosome-scale frog assemblies.
- 1314 Supplementary Note 4 Comparative analysis.
- 1315 Supplementary Note 5 Genome analysis.

1316 **Supplementary Data Files**

1317 **Supplementary Data 1: Table of sequencing data.**

1318 An MS Excel file summarizing the sequencing data used to construct the six frog genome  
1319 assemblies new or updated in this study, as well as the RNA-seq data used for annotating their  
1320 protein-coding genes. The *X. tropicalis* ChIP-seq data are also included.

1321

1322 **Supplementary Data 2: Genetic markers.**

1323 An MS Excel file containing the marker number, locus identifier, chromosome name,  
1324 centiMorgan position, and chromosome coordinate for each genetic marker in the F<sub>2</sub> *X.*  
1325 *tropicalis* genetic linkage map.
